# Supplementary material for: The First Application of 1H NMR Spectroscopy for the Assessment of the Authenticity of Perfumes
Source: MDPI journal article supplement (doi:10.3390/molecules26113098), 2021-05-22
Supplement: s1 [file s1]

## Supporting information

# The first application of $^1\text{H}$ NMR spectroscopy for the assessment of the authenticity of perfumes

Barbara Pacholczyk-Sienicka,<sup>a\*</sup> Grzegorz Ciepielowski,<sup>a</sup> Łukasz Albrecht<sup>a</sup>

<sup>a</sup>*Institute of Organic Chemistry, Faculty of Chemistry, Lodz University of Technology, Zeromskiego 116, 90-924 Lodz, Poland*

## Table of contents

|                                                                                                       |    |
|-------------------------------------------------------------------------------------------------------|----|
| 1. Comparison of integration values of $^1\text{H}$ NMR signals.....                                  | 2  |
| 2. Representative $^1\text{H}$ NMR spectra of the authentic, inspired and counterfeited samples. .... | 13 |
| 3. Table with main compounds assigned in $^1\text{H}$ NMR spectra of perfume samples.....             | 20 |
| 4. PCA analysis conducted for full spectrum bucket tables. ....                                       | 25 |
| 5. Comparison of the bucket tables from NMR spectra for two authentic samples. ....                   | 26 |

1. Comparison of integration values of  $^1\text{H}$  NMR signals

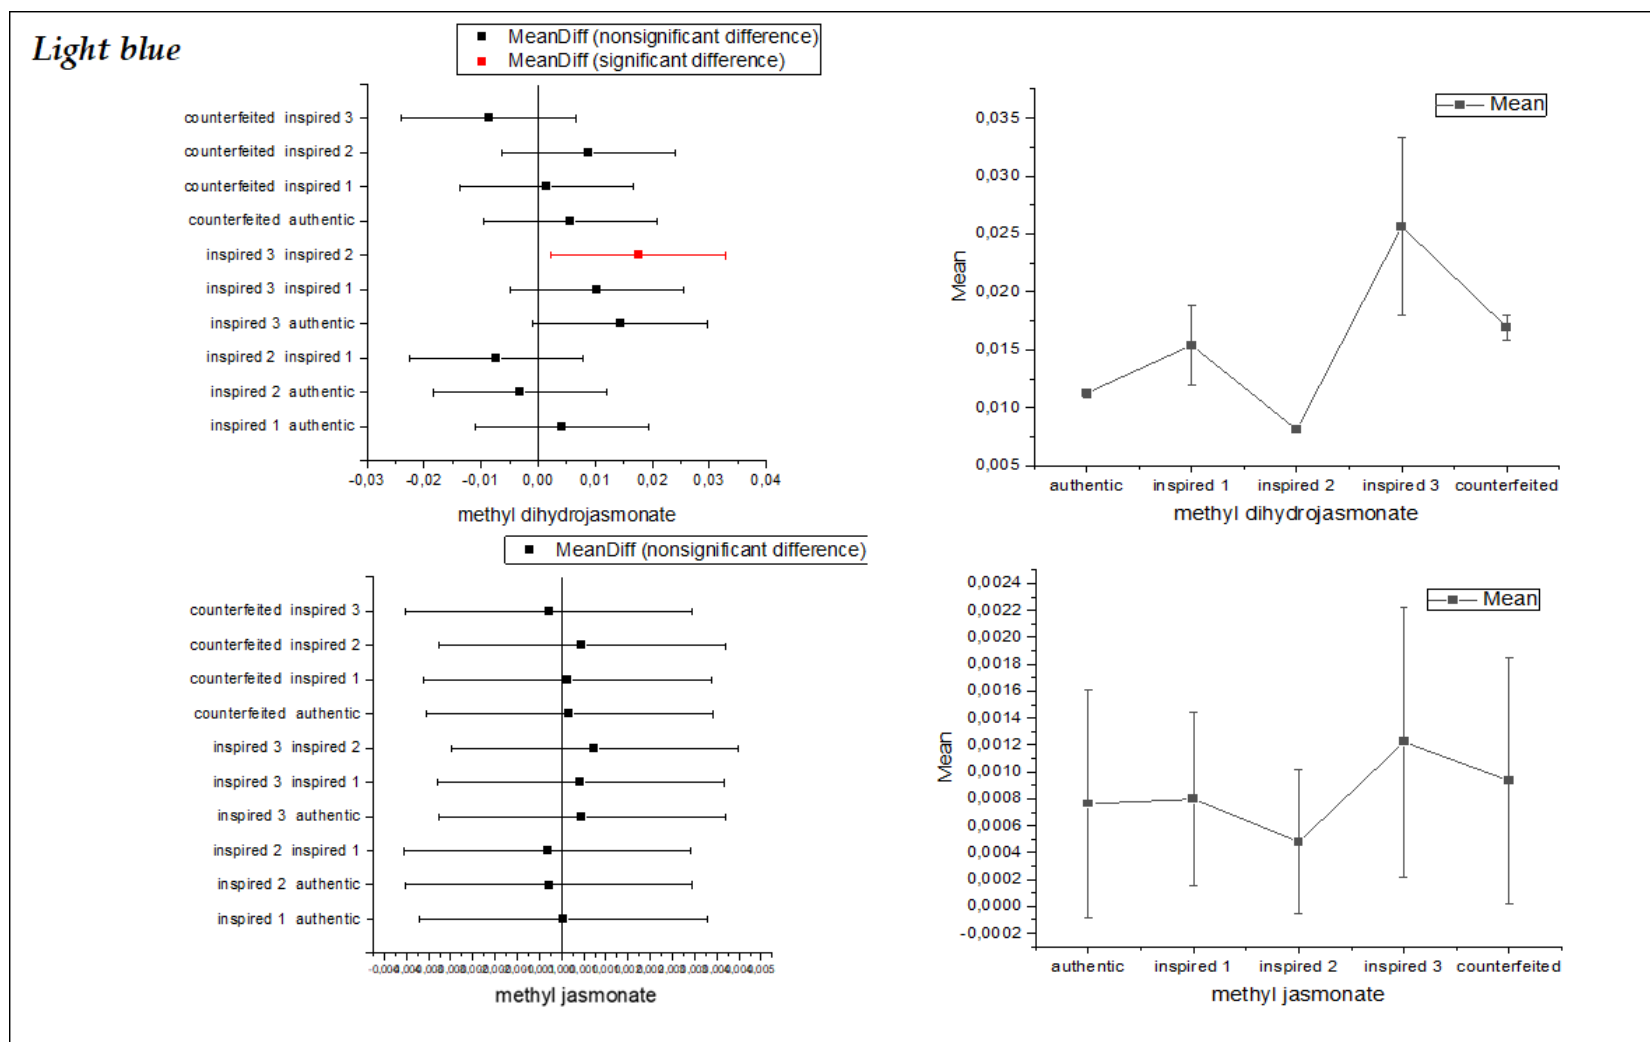

**Figure S1** The comparison of the means integration values of  $^1\text{H}$  NMR signals for authentic, inspired and counterfeited *Light Blue* samples obtained by ANOVA. (Tukey test,  $p < 0.05$ ).

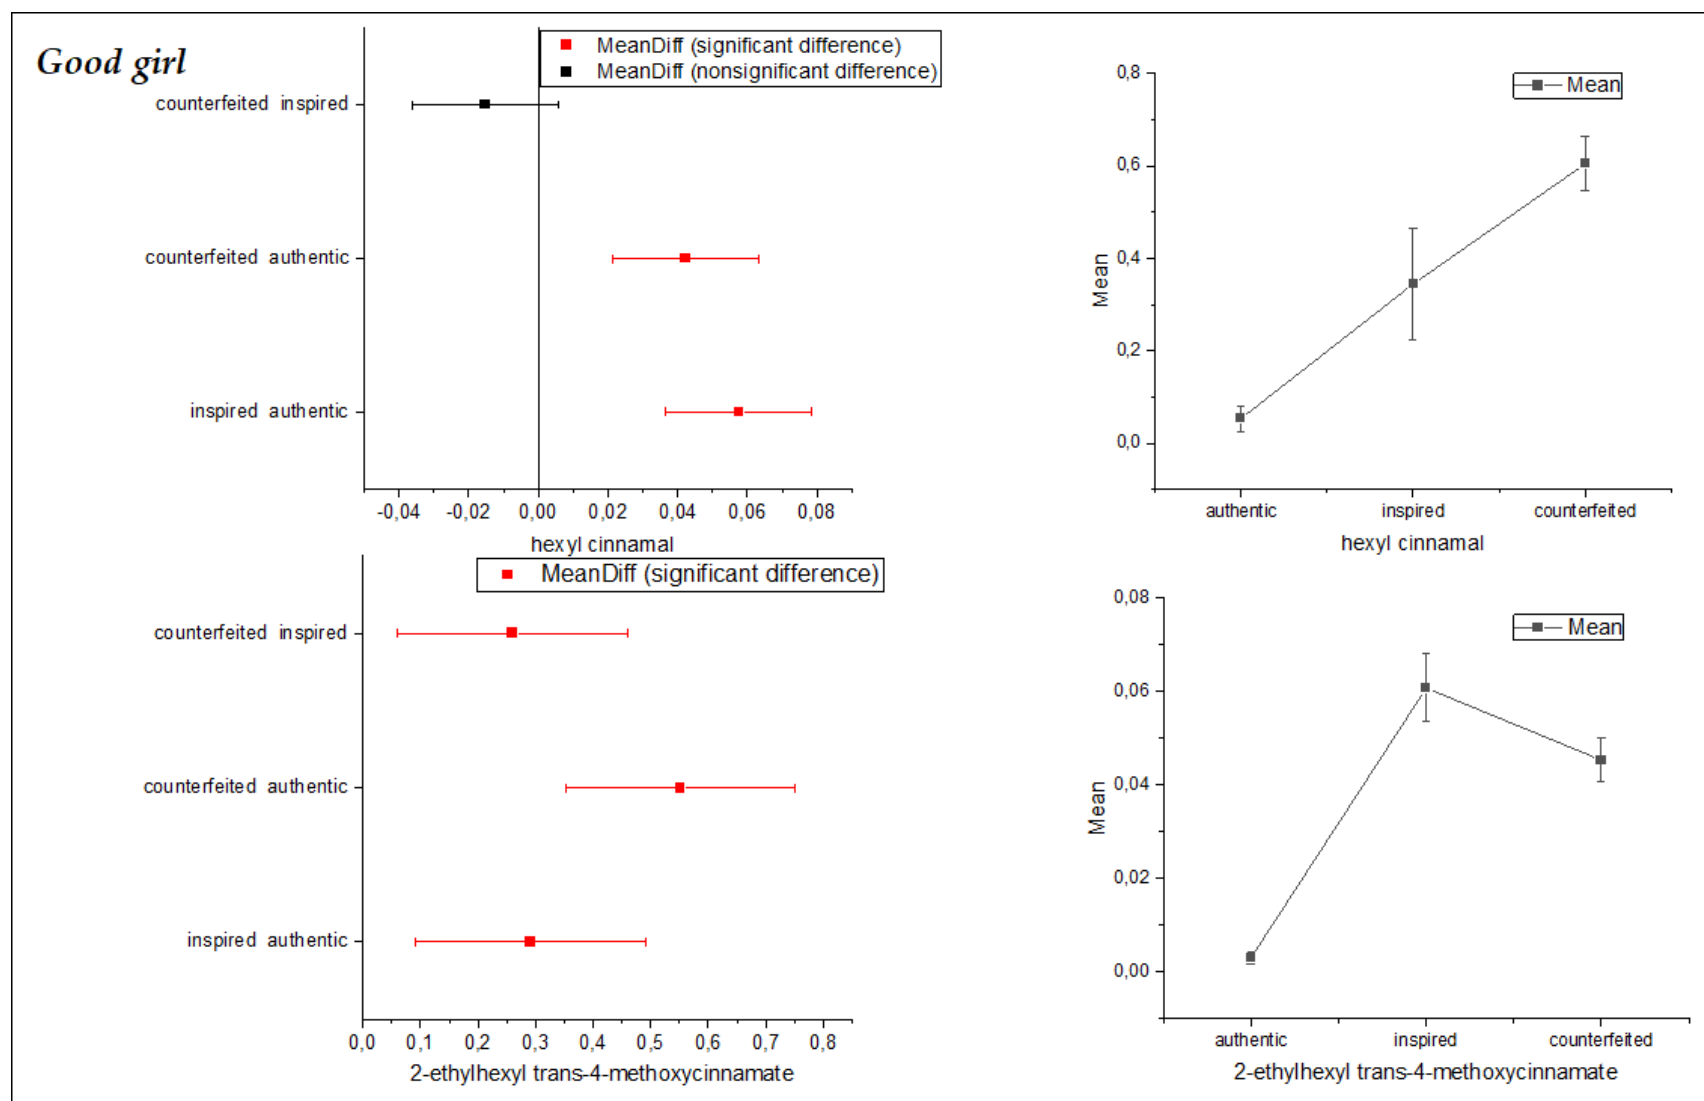

**Figure S2** The comparison of the means integration values of  $^1\text{H}$  NMR signals for authentic, inspired and counterfeited *Good girl* samples obtained by ANOVA. (Tukey test,  $p < 0.05$ ).

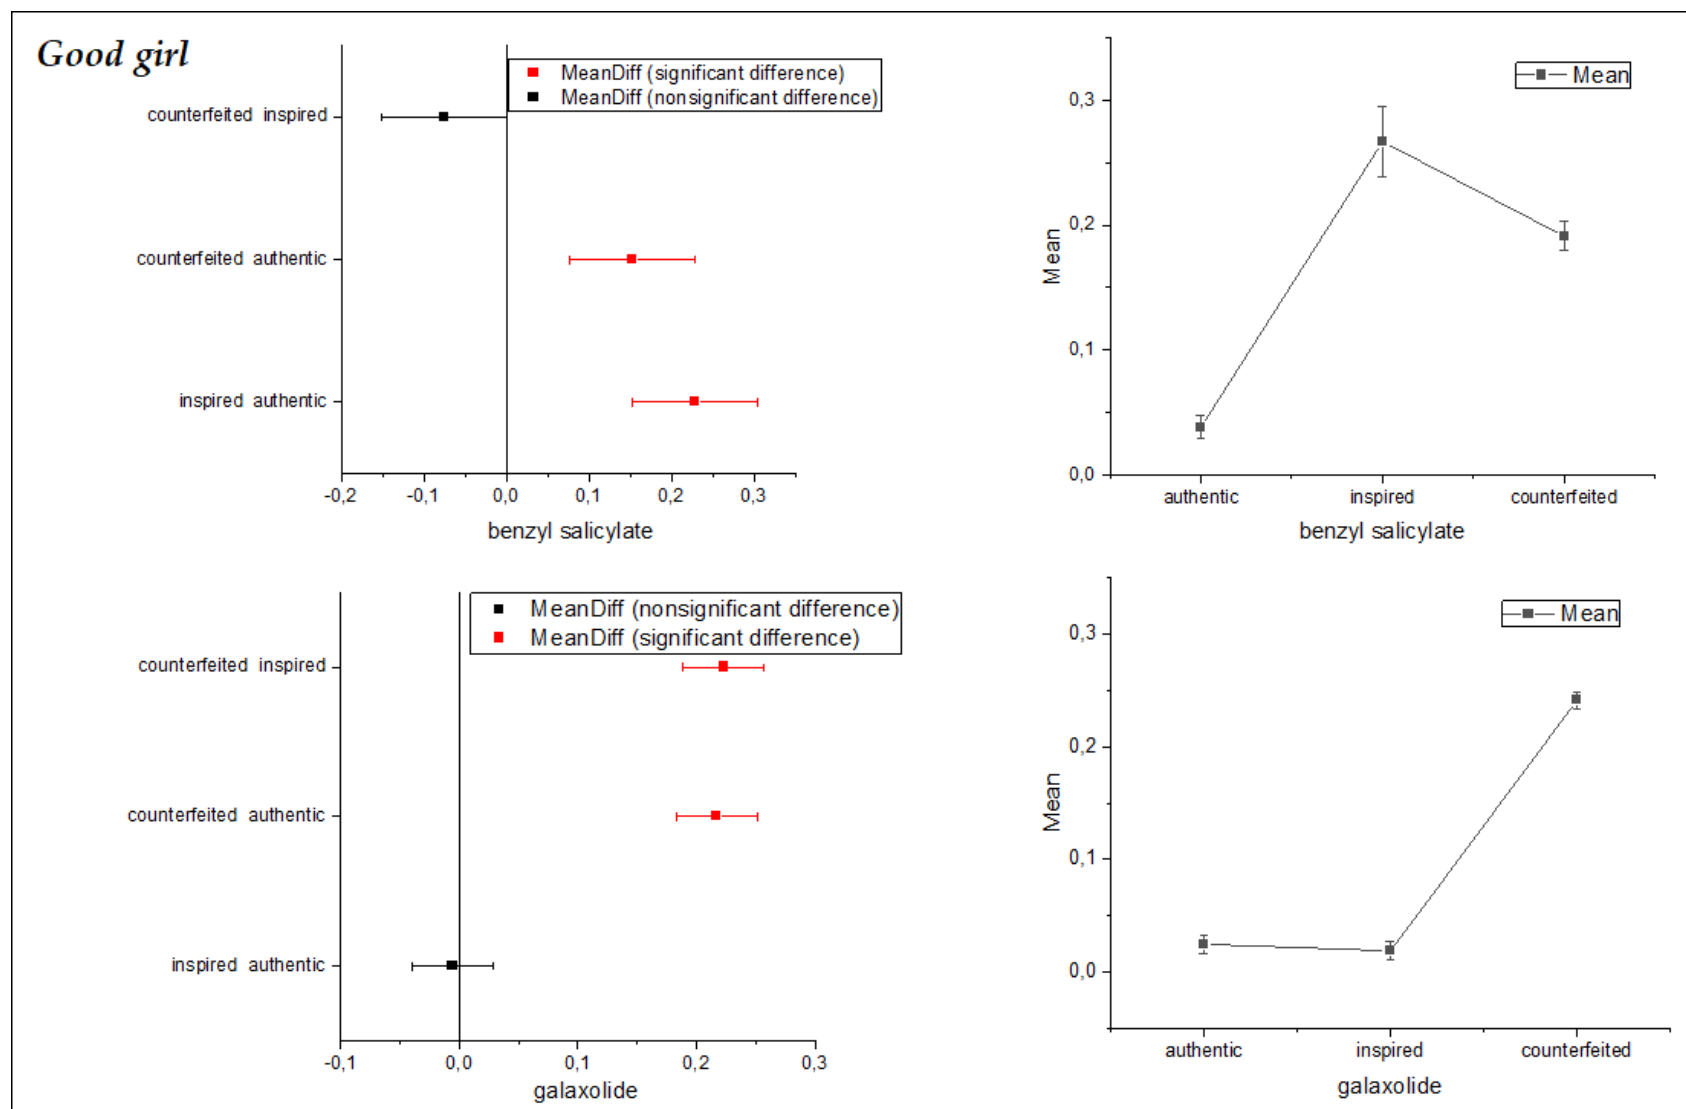

**Figure S3** The comparison of the means integration values of  $^1\text{H}$  NMR signals for authentic, inspired and counterfeited *Good girl* samples obtained by ANOVA. (Tukey test,  $p < 0.05$ ).

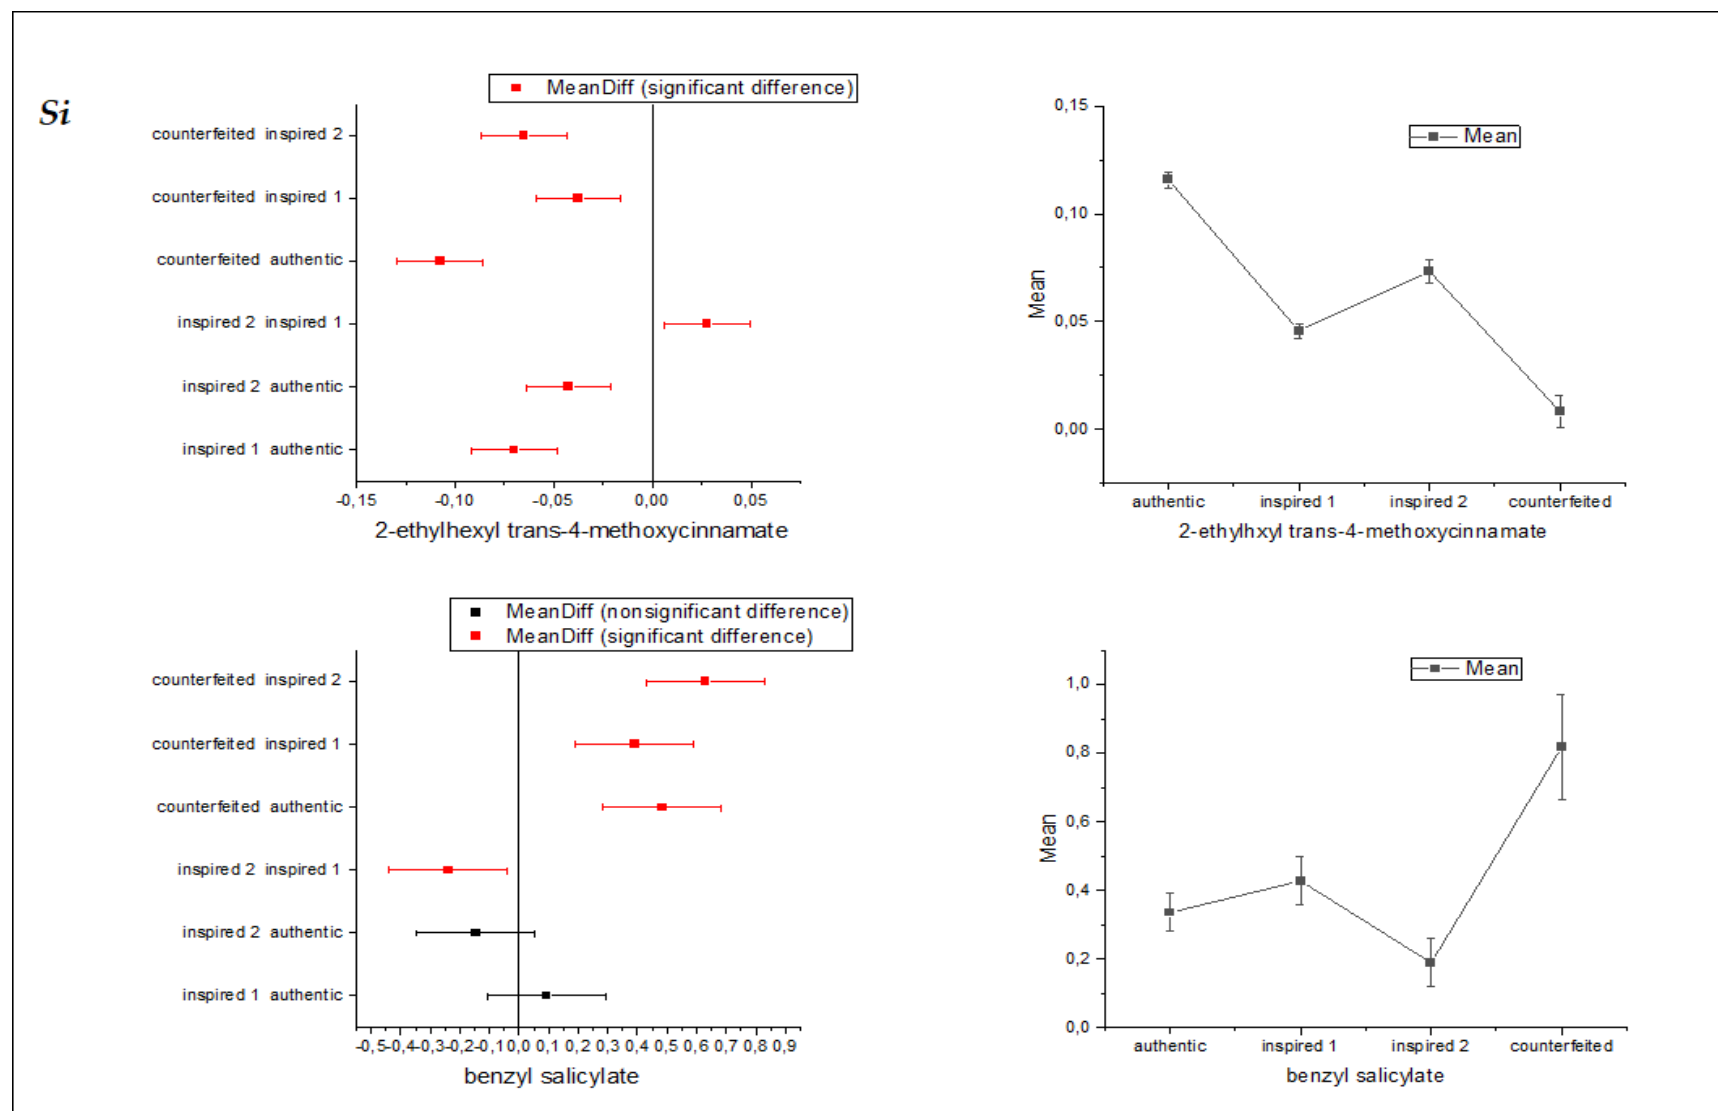

**Figure S4** The comparison of the means integration values of  $^1\text{H}$  NMR signals for authentic, inspired and counterfeited *Si* samples obtained by ANOVA. (Tukey test,  $p < 0.05$ ).

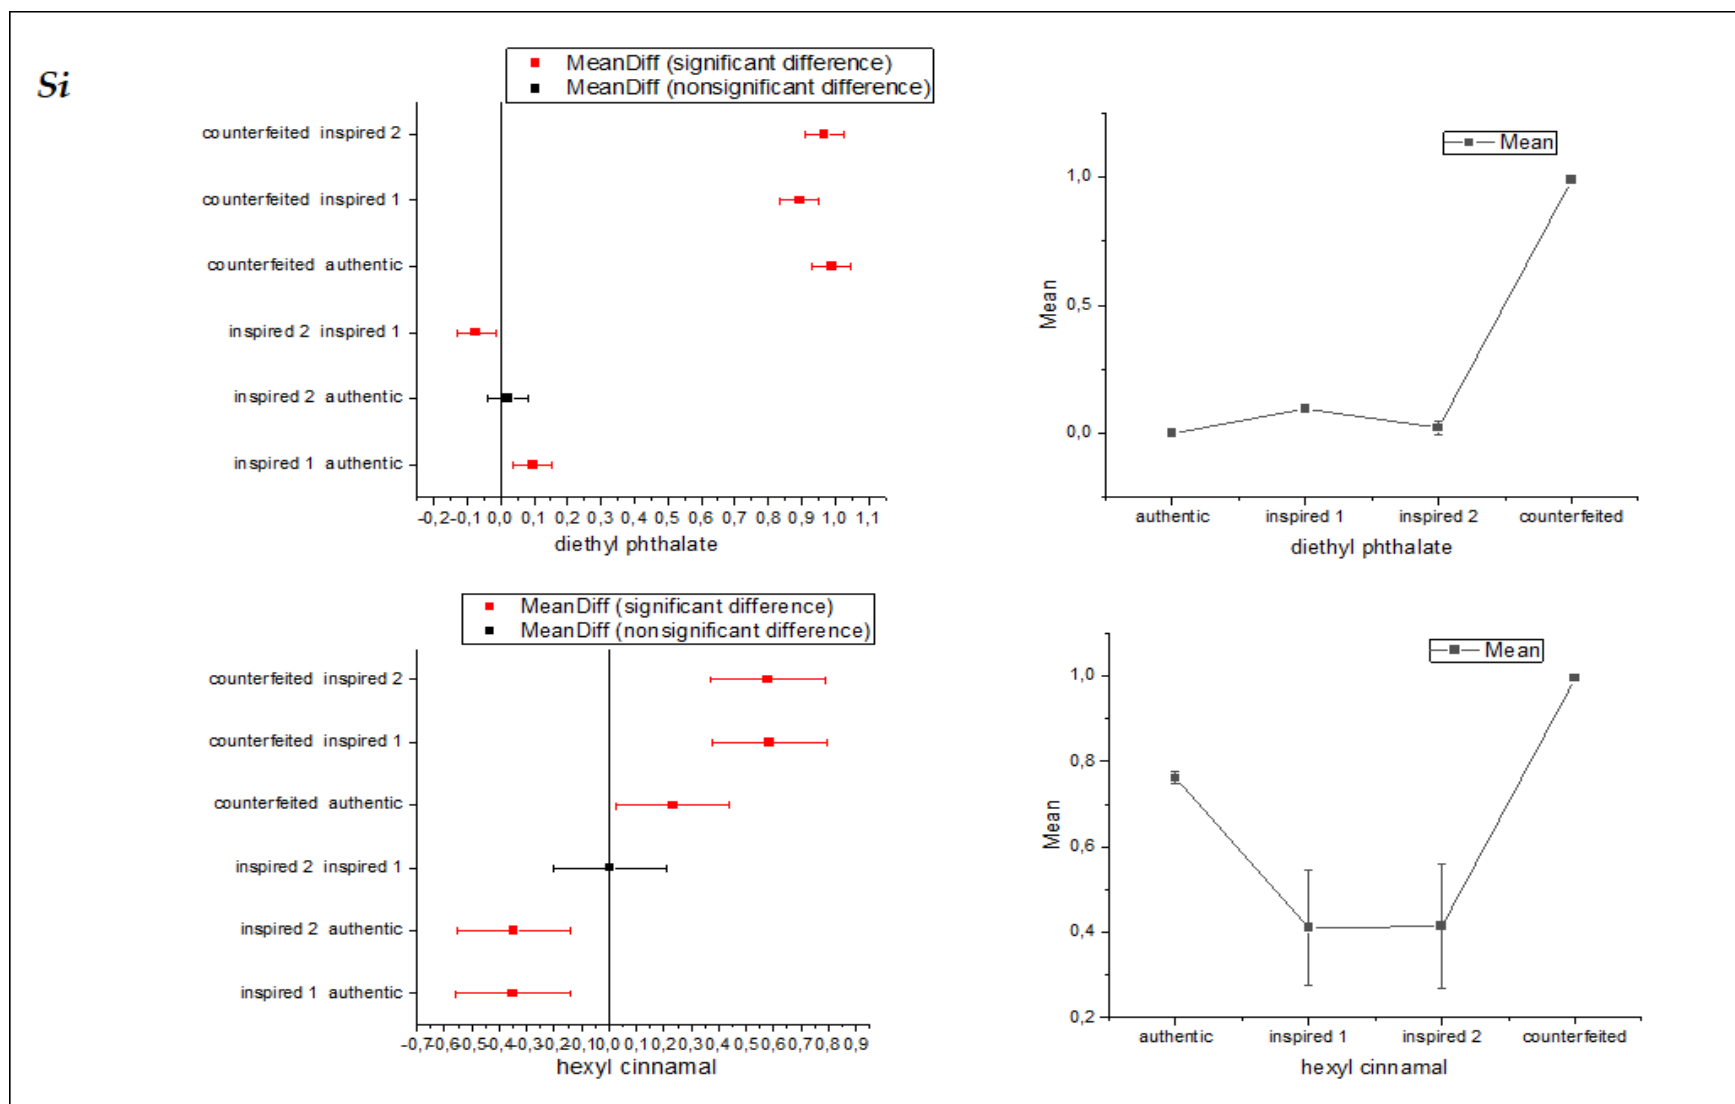

**Figure S5** The comparison of the means integration values of  $^1\text{H}$  NMR signals for authentic, inspired and counterfeited *Si* samples obtained by ANOVA. (Tukey test,  $p < 0.05$ ).

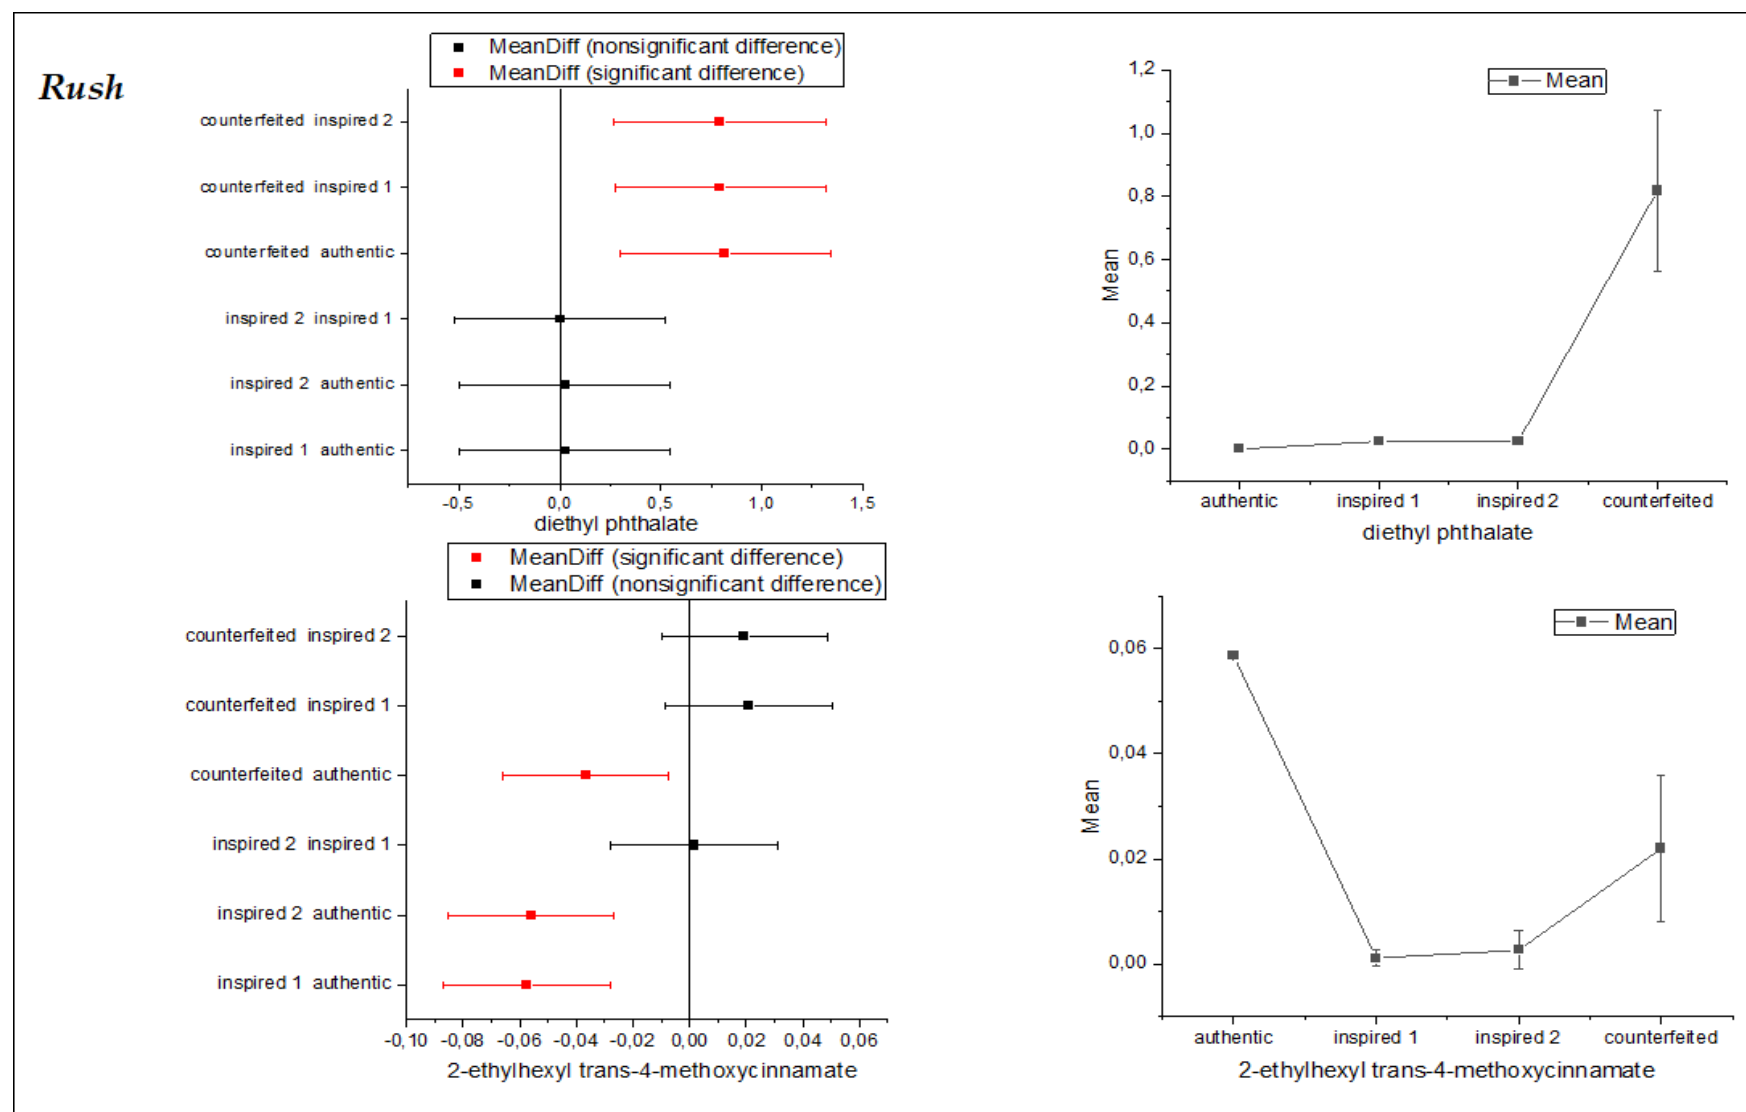

**Figure S6** The comparison of the means integration values of  $^1\text{H}$  NMR signals for authentic, inspired and counterfeited *Rush* samples obtained by ANOVA. (Tukey test,  $p < 0.05$ ).

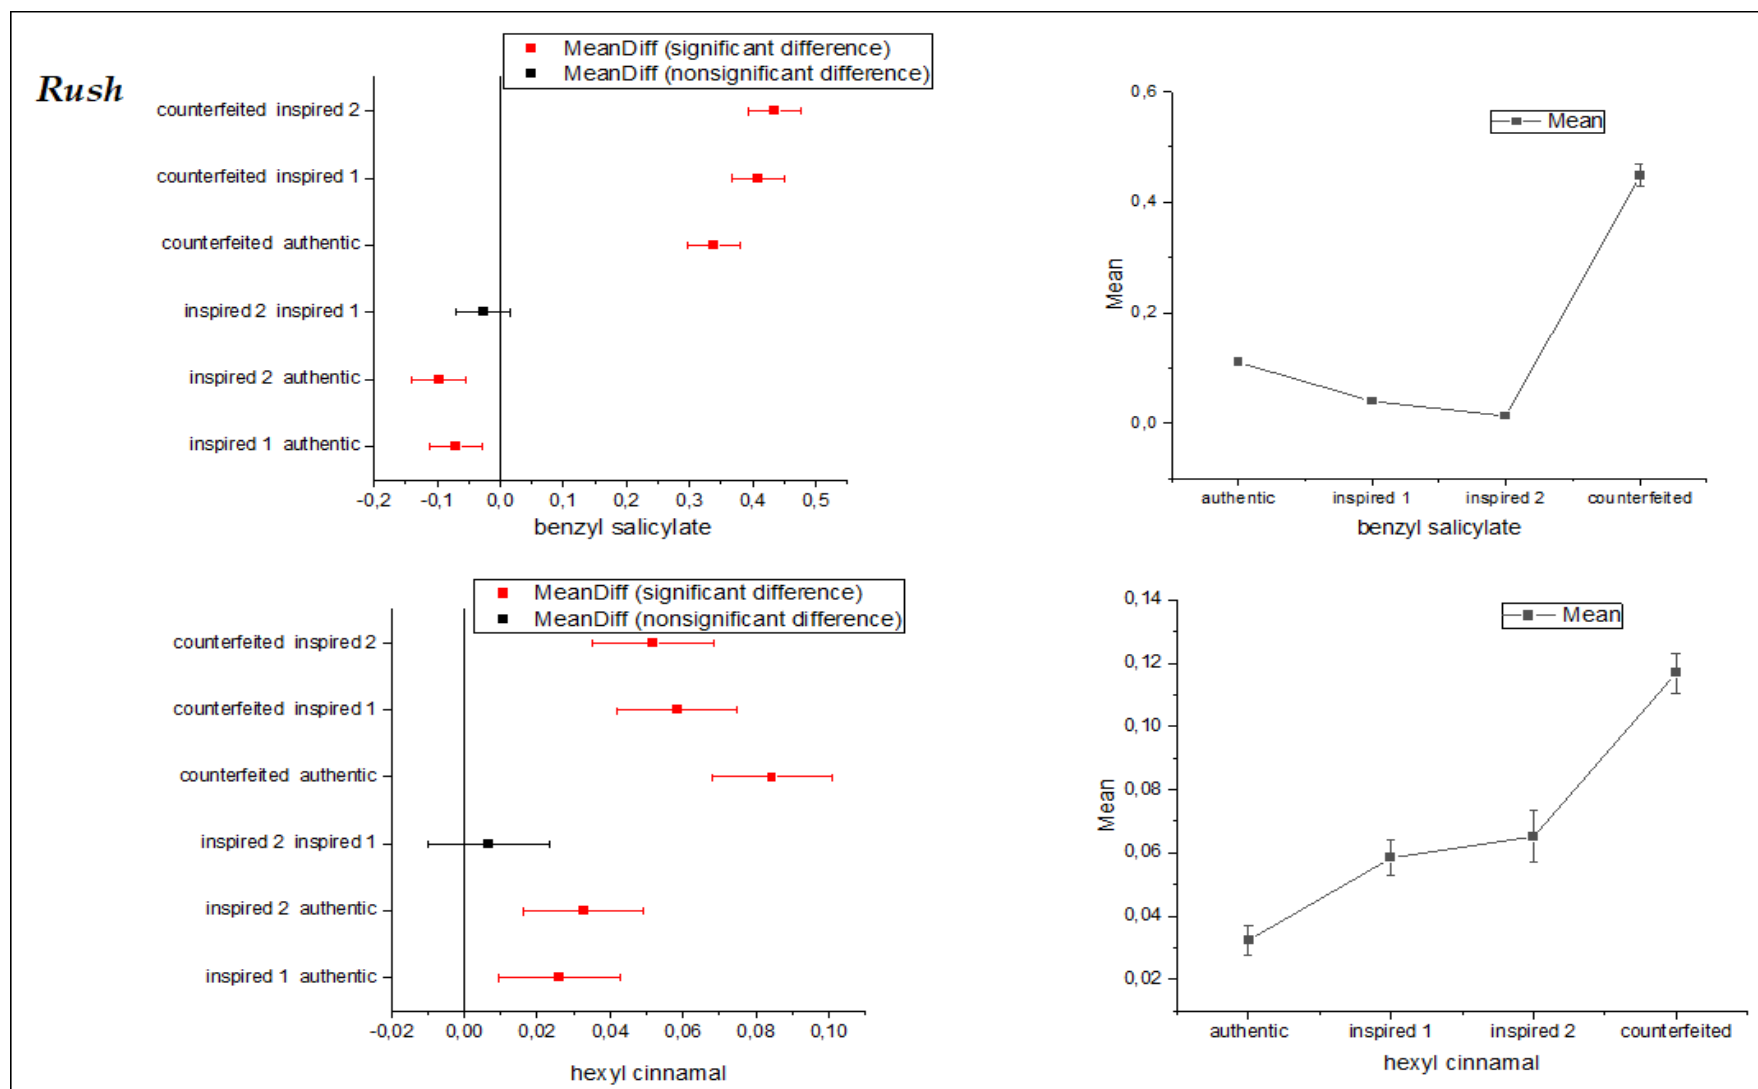

**Figure S7** The comparison of the means integration values of  $^1\text{H}$  NMR signals for authentic, inspired and counterfeited *Rush* samples obtained by ANOVA. (Tukey test,  $p < 0.05$ ).

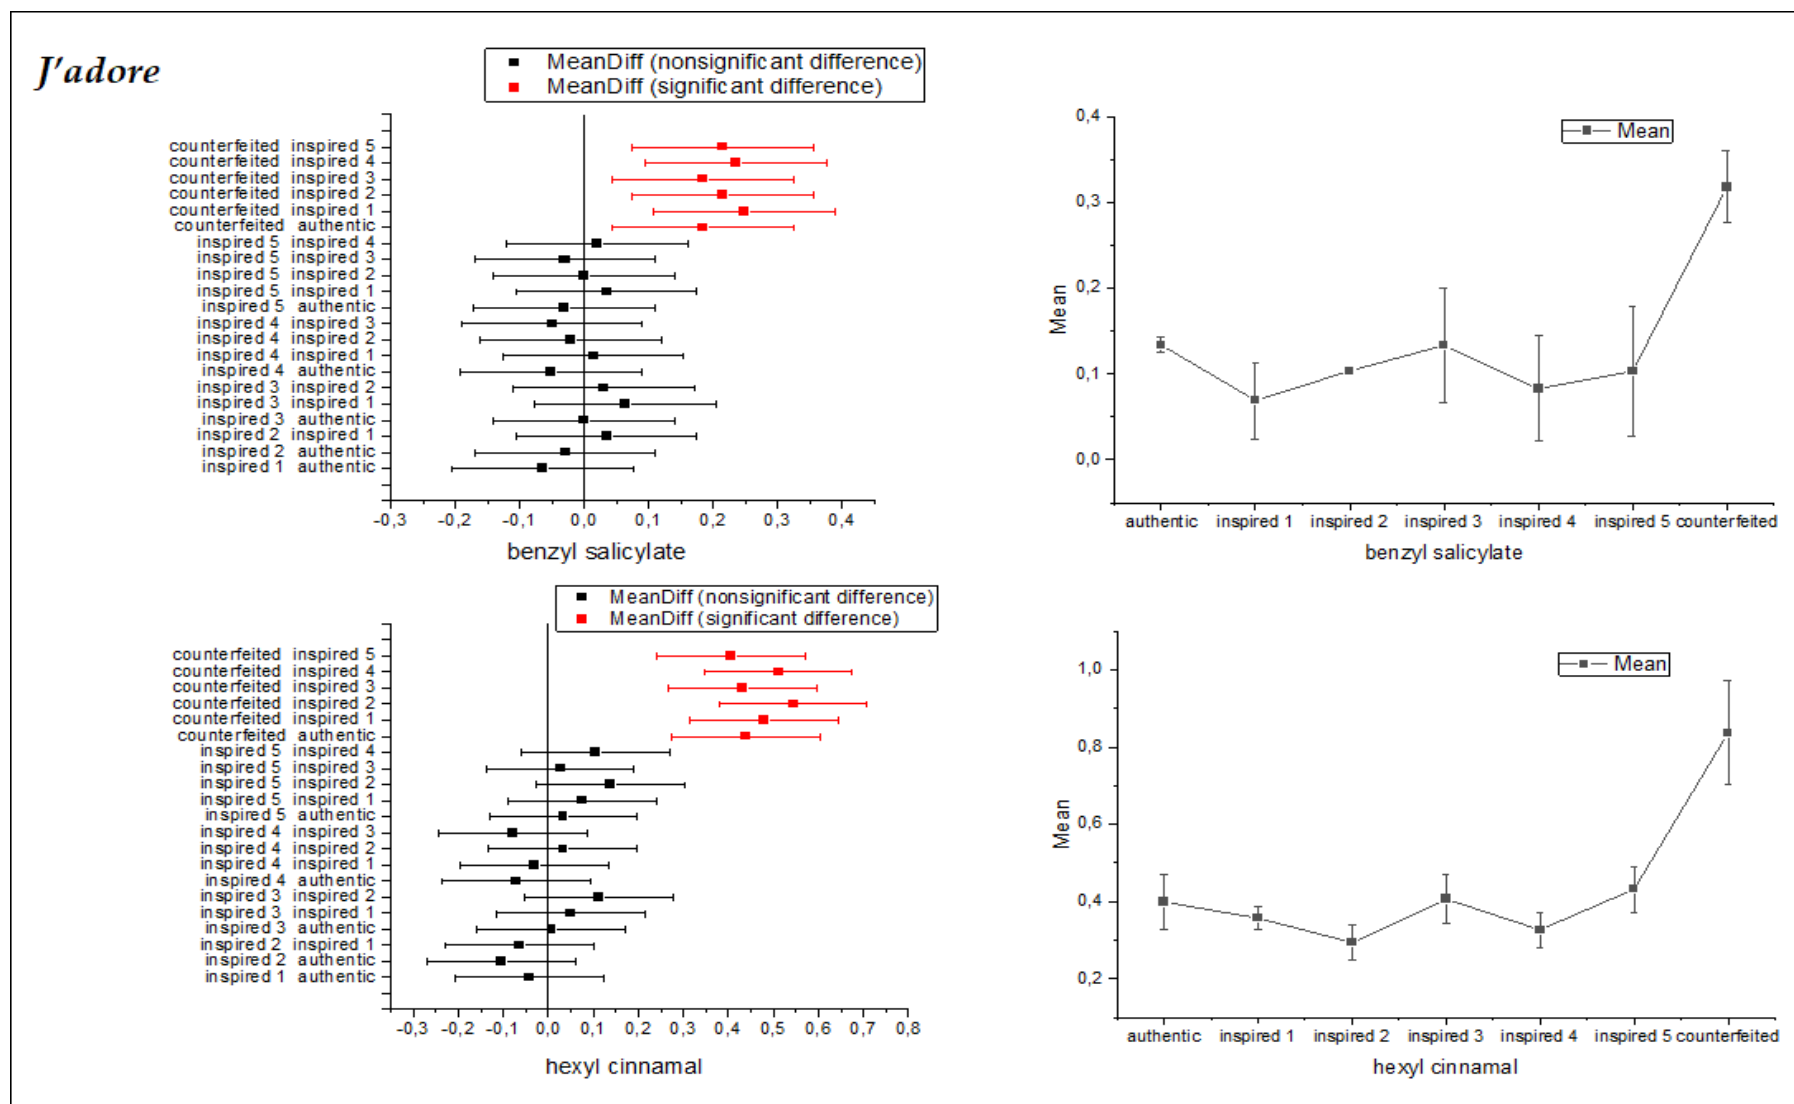

**Figure S8** The comparison of the means integration values of  $^1\text{H}$  NMR signals for authentic, inspired and counterfeited *J'adore* samples obtained by ANOVA. (Tukey test,  $p < 0.05$ ).

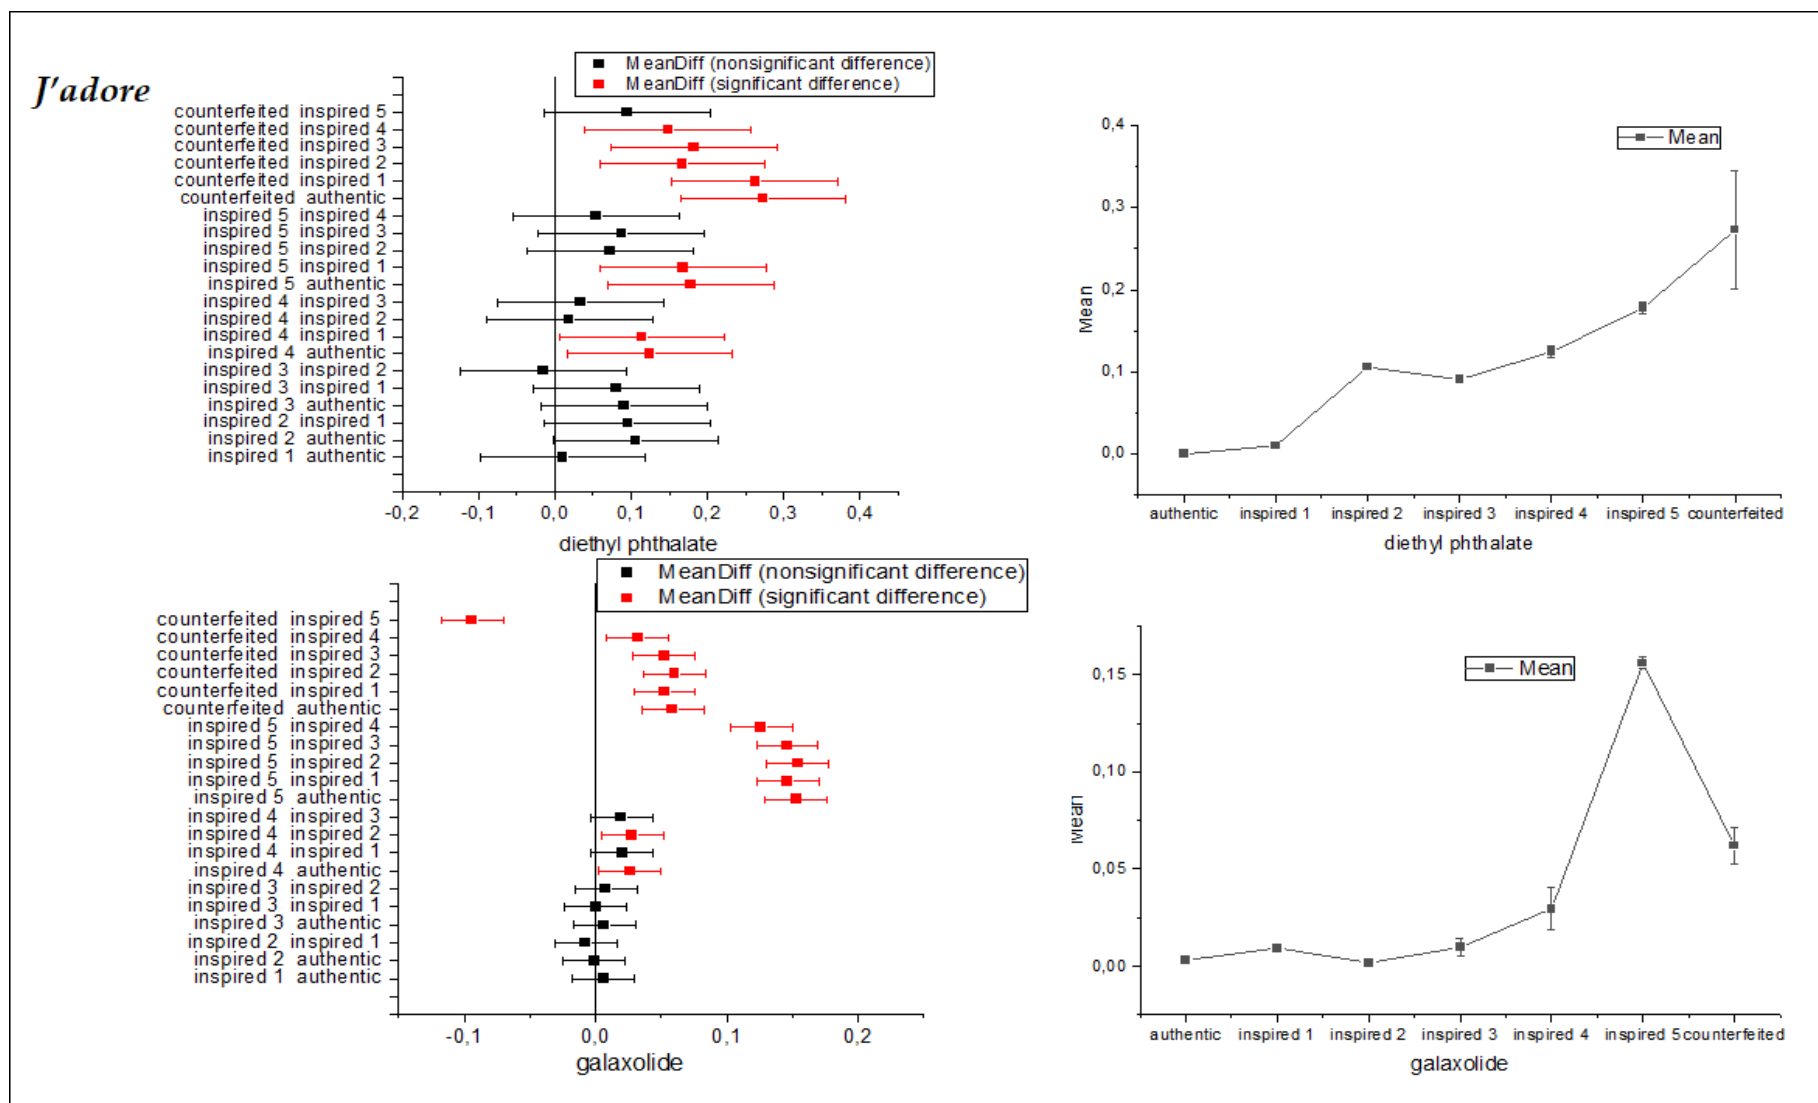

**Figure S9** The comparison of the means integration values of  $^1\text{H}$  NMR signals for authentic, inspired and counterfeited *J'adore* samples obtained by ANOVA. (Tukey test,  $p < 0.05$ ).

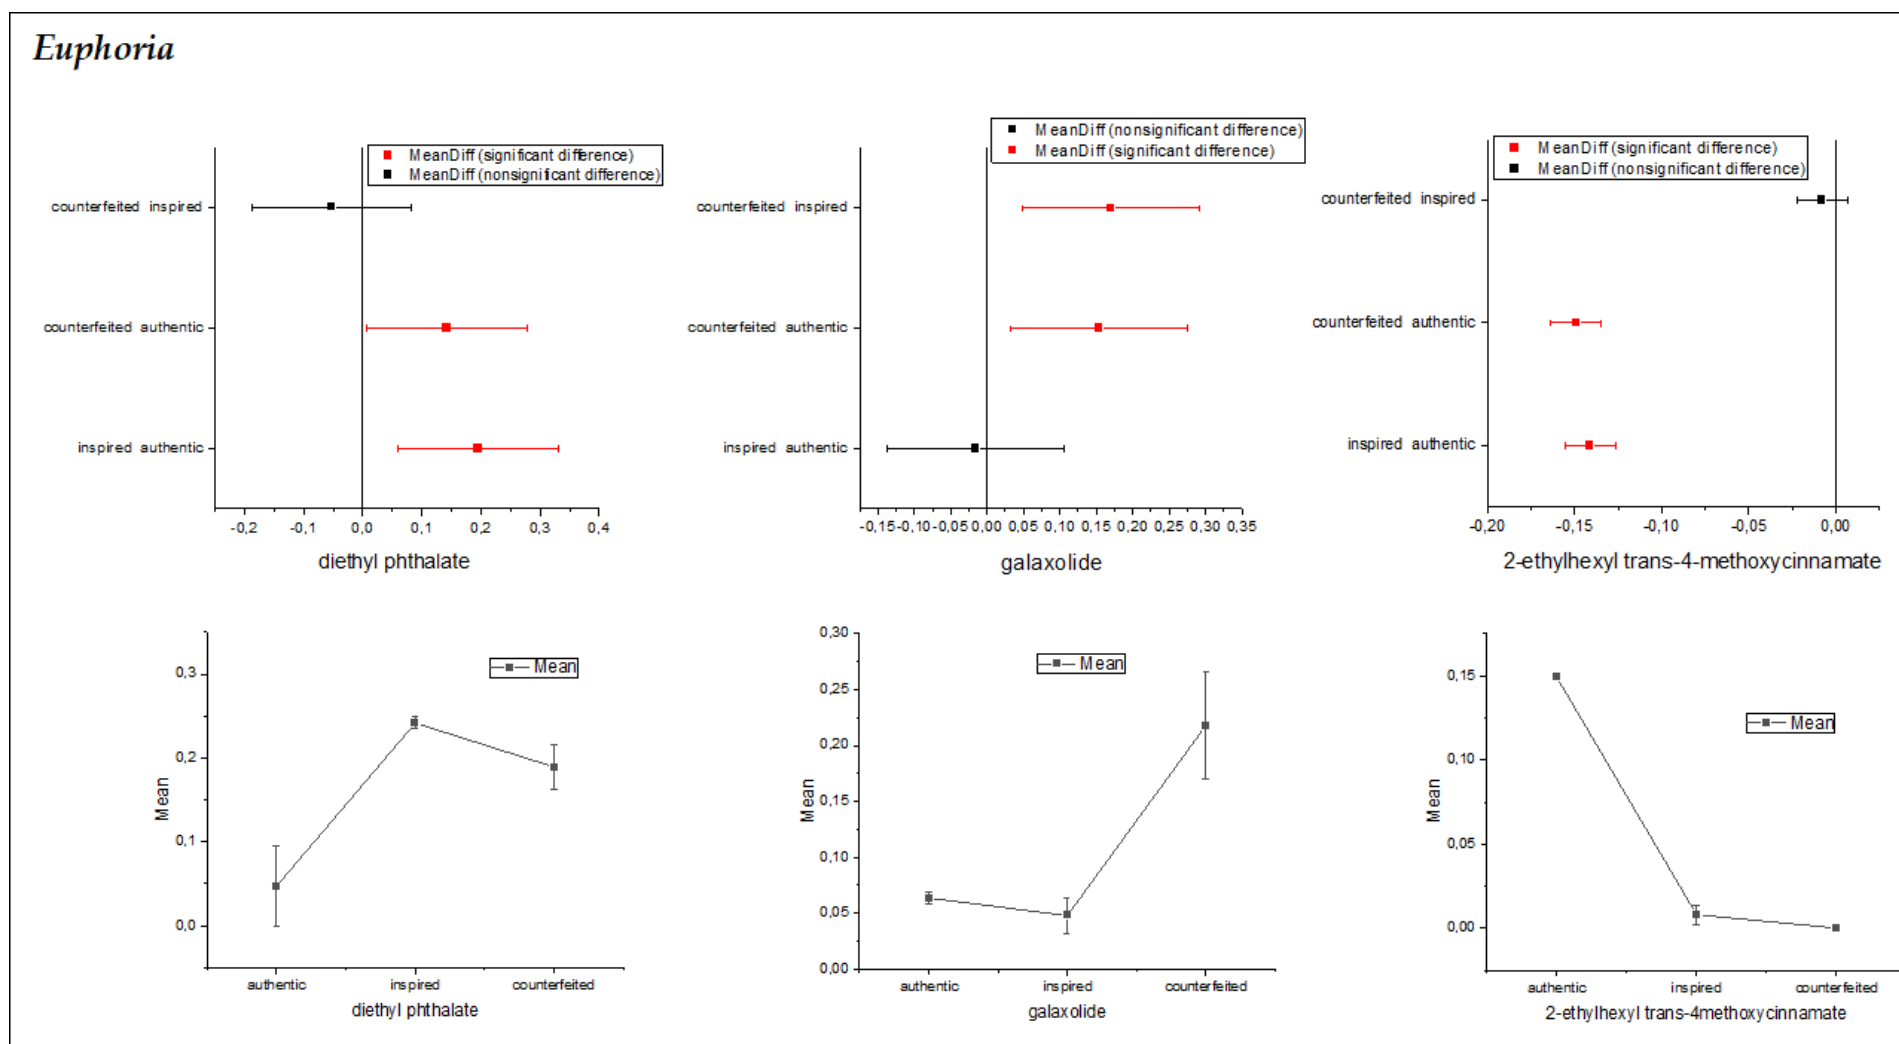

**Figure S10** The comparison of the means integration values of  $^1\text{H}$  NMR signals for authentic, inspired and counterfeited *Euphoria* samples obtained by ANOVA. (Tukey test,  $p < 0.05$ ).

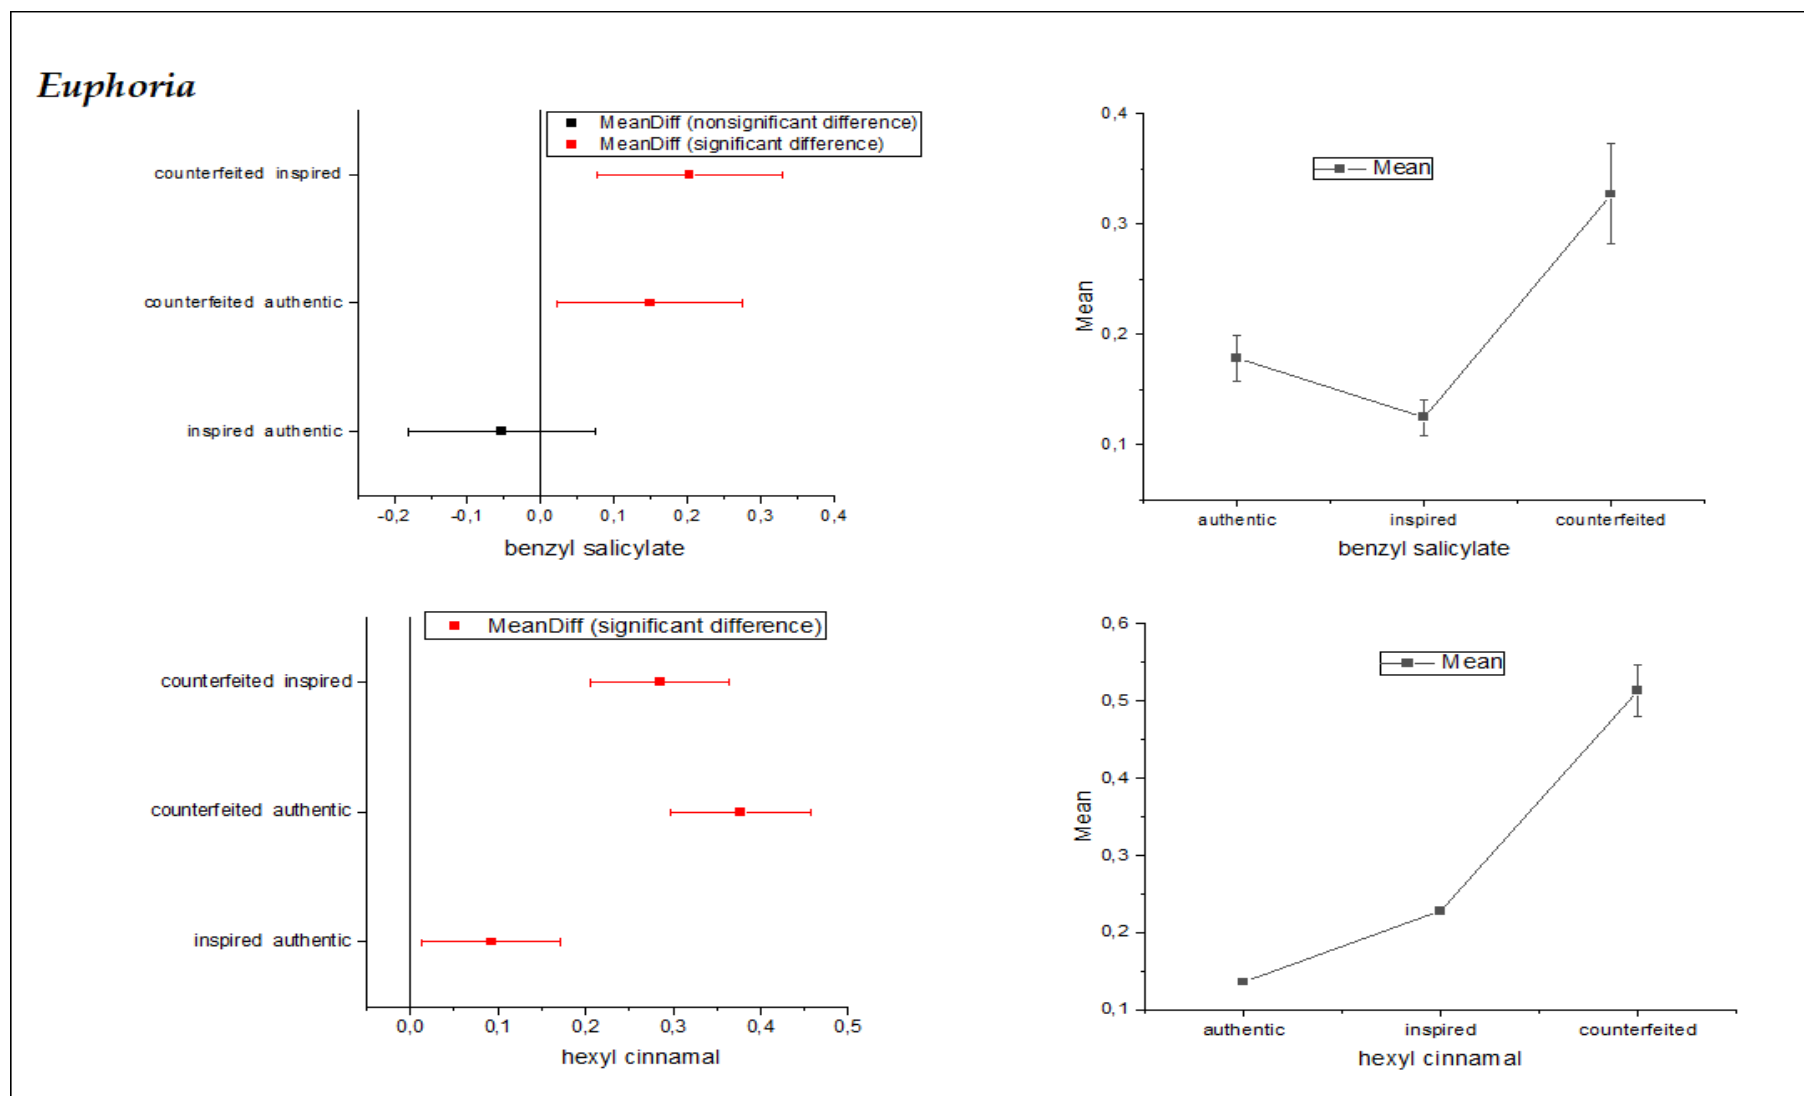

**Figure S11** The comparison of the means integration values of  $^1\text{H}$  NMR signals for authentic, inspired and counterfeited *Euphoria* samples obtained by ANOVA. (Tukey test,  $p < 0.05$ ).

2. Representative  $^1\text{H}$  NMR spectra of the authentic, inspired and counterfeited samples.

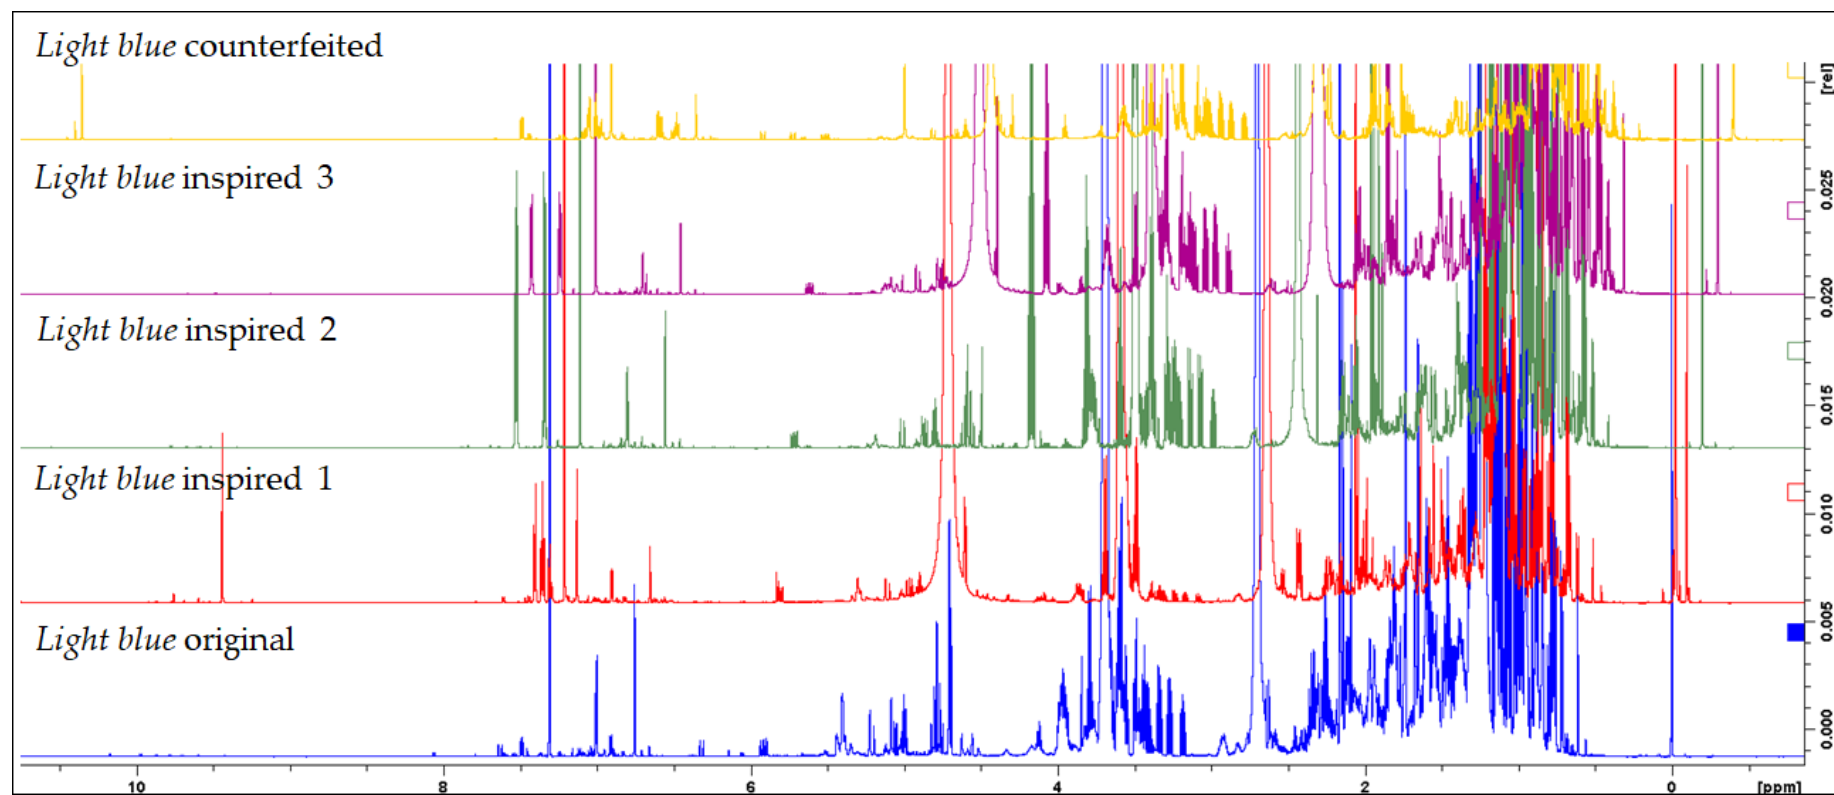

**Figure S12**  $^1\text{H}$  NMR spectra of authentic, inspired and counterfeited samples of *Light blue* in spectral region from 0 to 11 ppm.

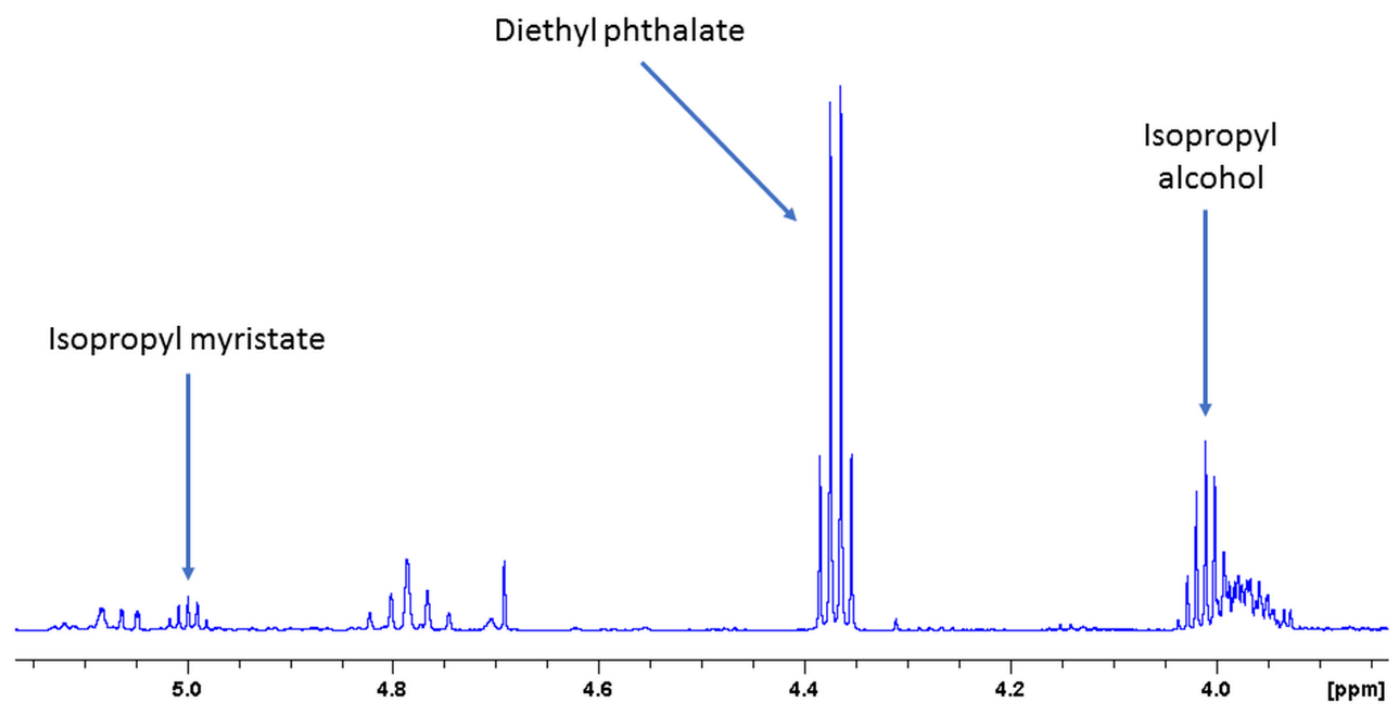

**Figure S13.** Expanded region of  $^1\text{H}$  NMR spectrum of inspired *Light blue* sample in the region of chemical shift from 3.85 ppm and to 5.15 ppm.

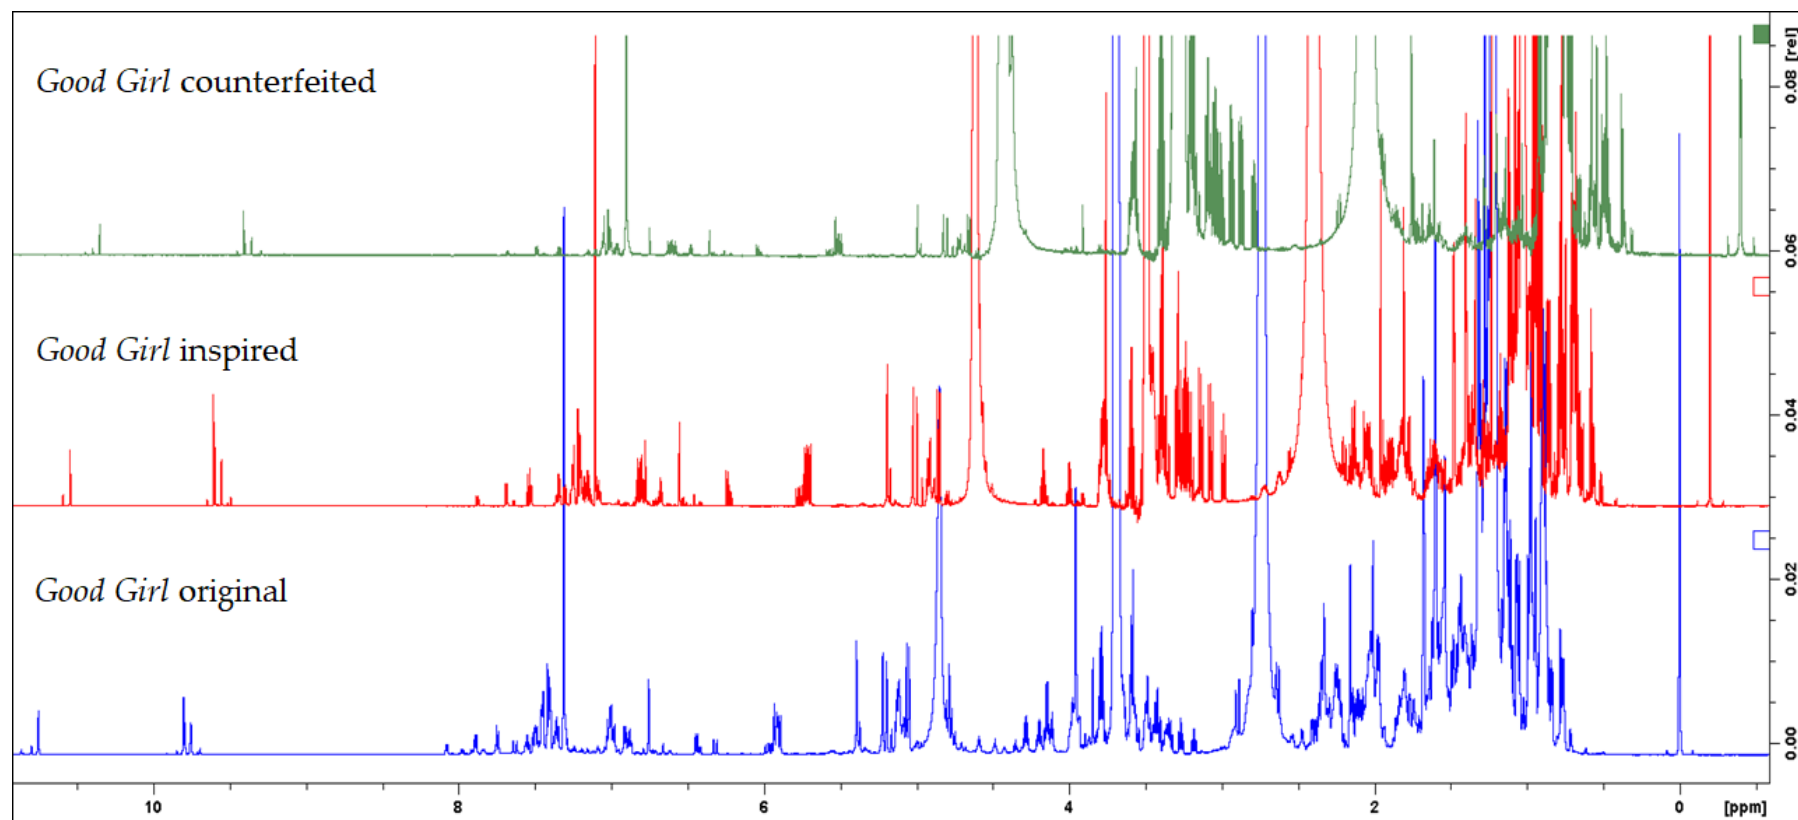

**Figure S14**  $^1\text{H}$  NMR spectra of authentic, inspired and counterfeited samples of *Good girl* in spectral region from 0 to 11 ppm.

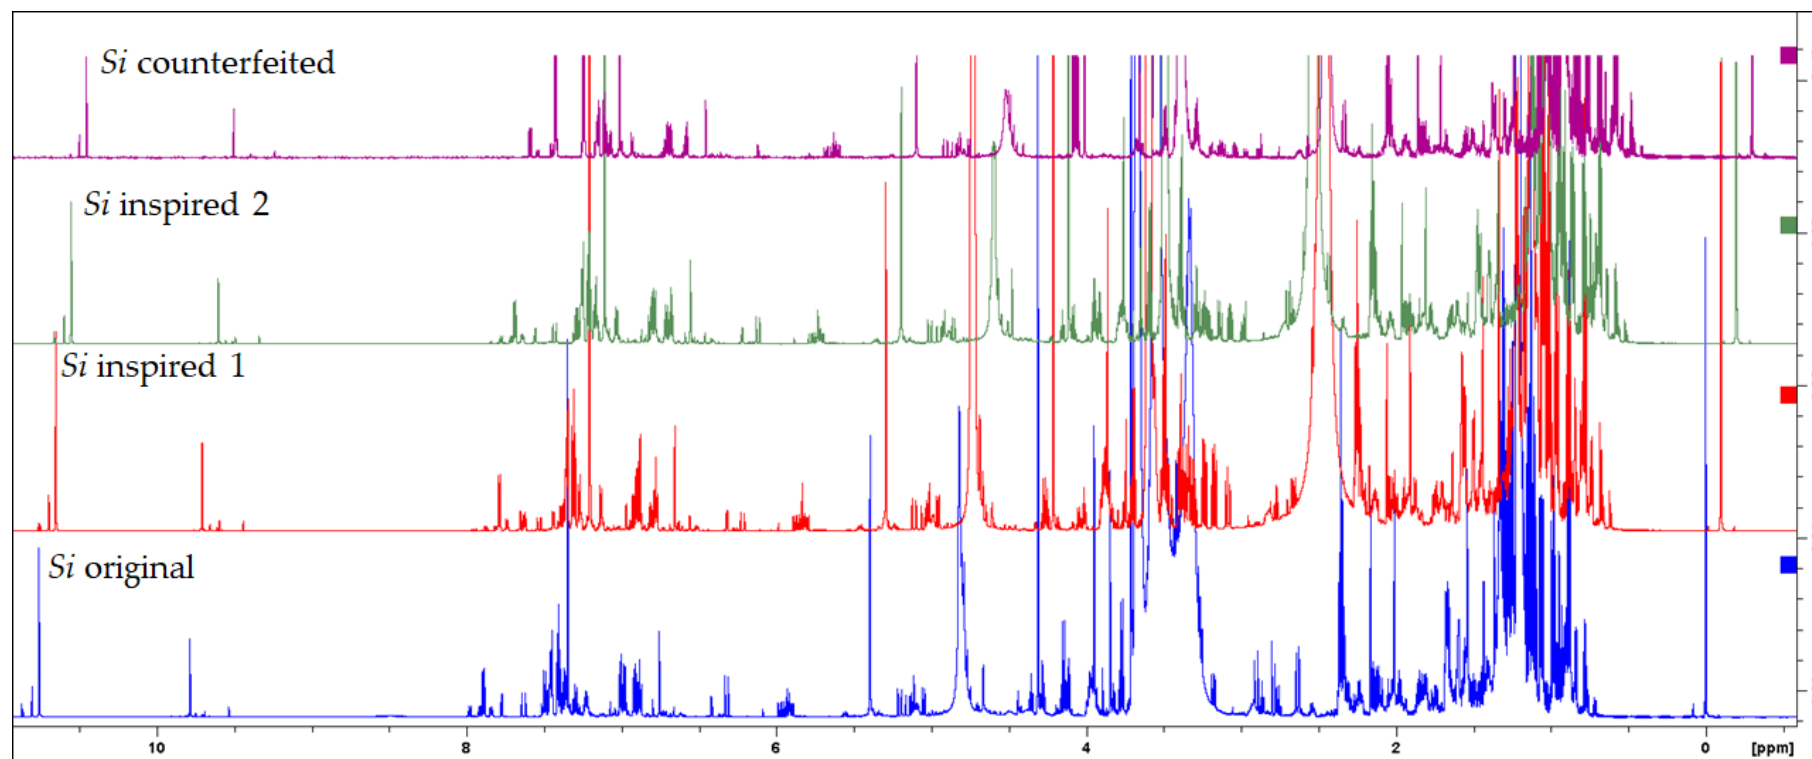

**Figure S15**  $^1\text{H}$  NMR spectra of authentic, inspired and counterfeited samples of *Si* in spectral region from 0 to 11 ppm.

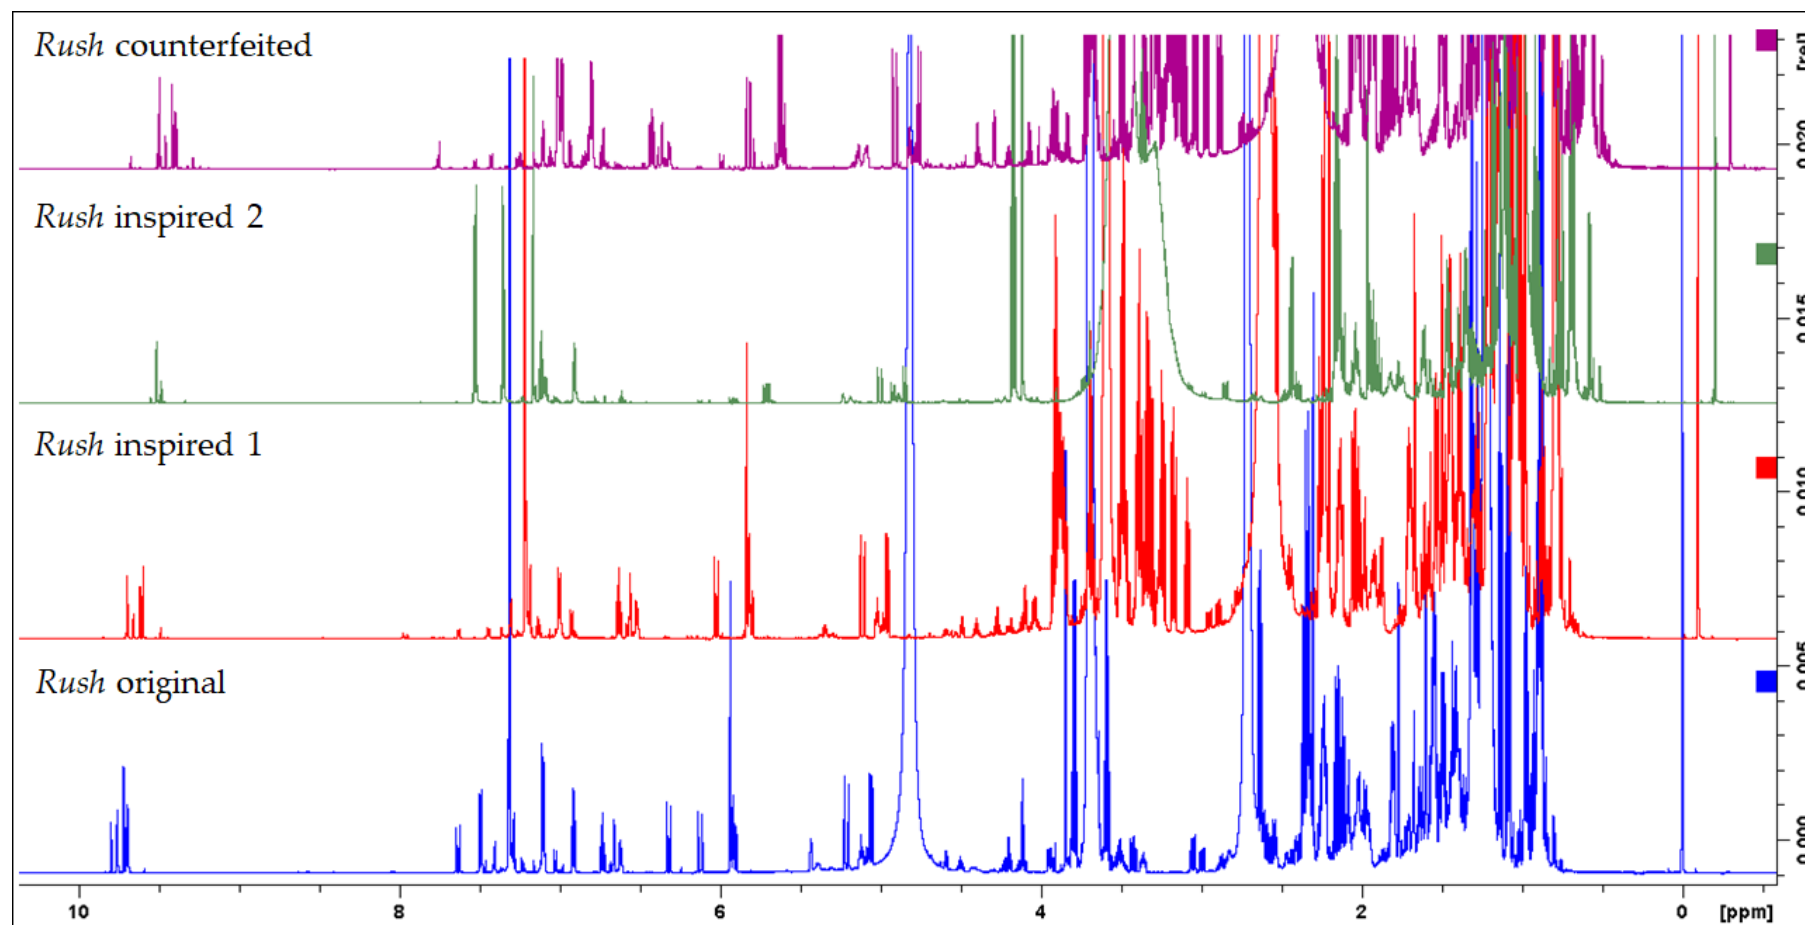

**Figure S16**  $^1\text{H}$  NMR spectra of authentic, inspired and counterfeited samples of *Rush* in spectral region from 0 to 11 ppm.

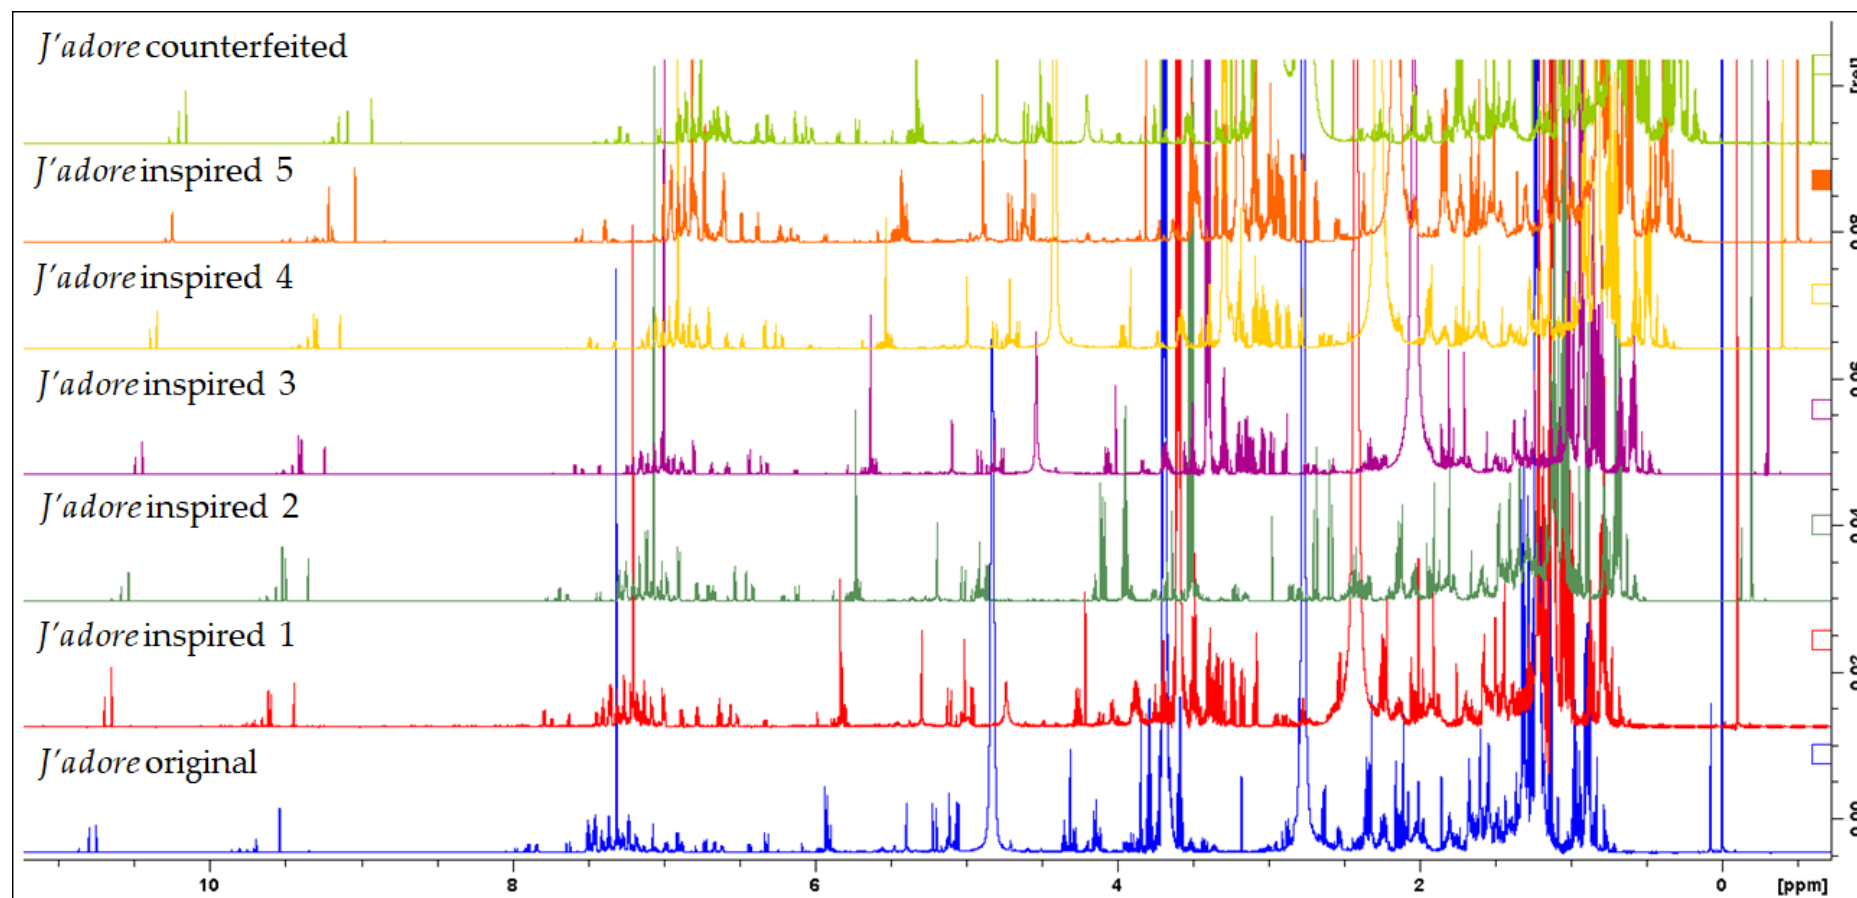

**Figure S17**  $^1\text{H}$  NMR spectra of authentic, inspired and counterfeited samples of *J'adore* in spectral region from 0 to 11 ppm.

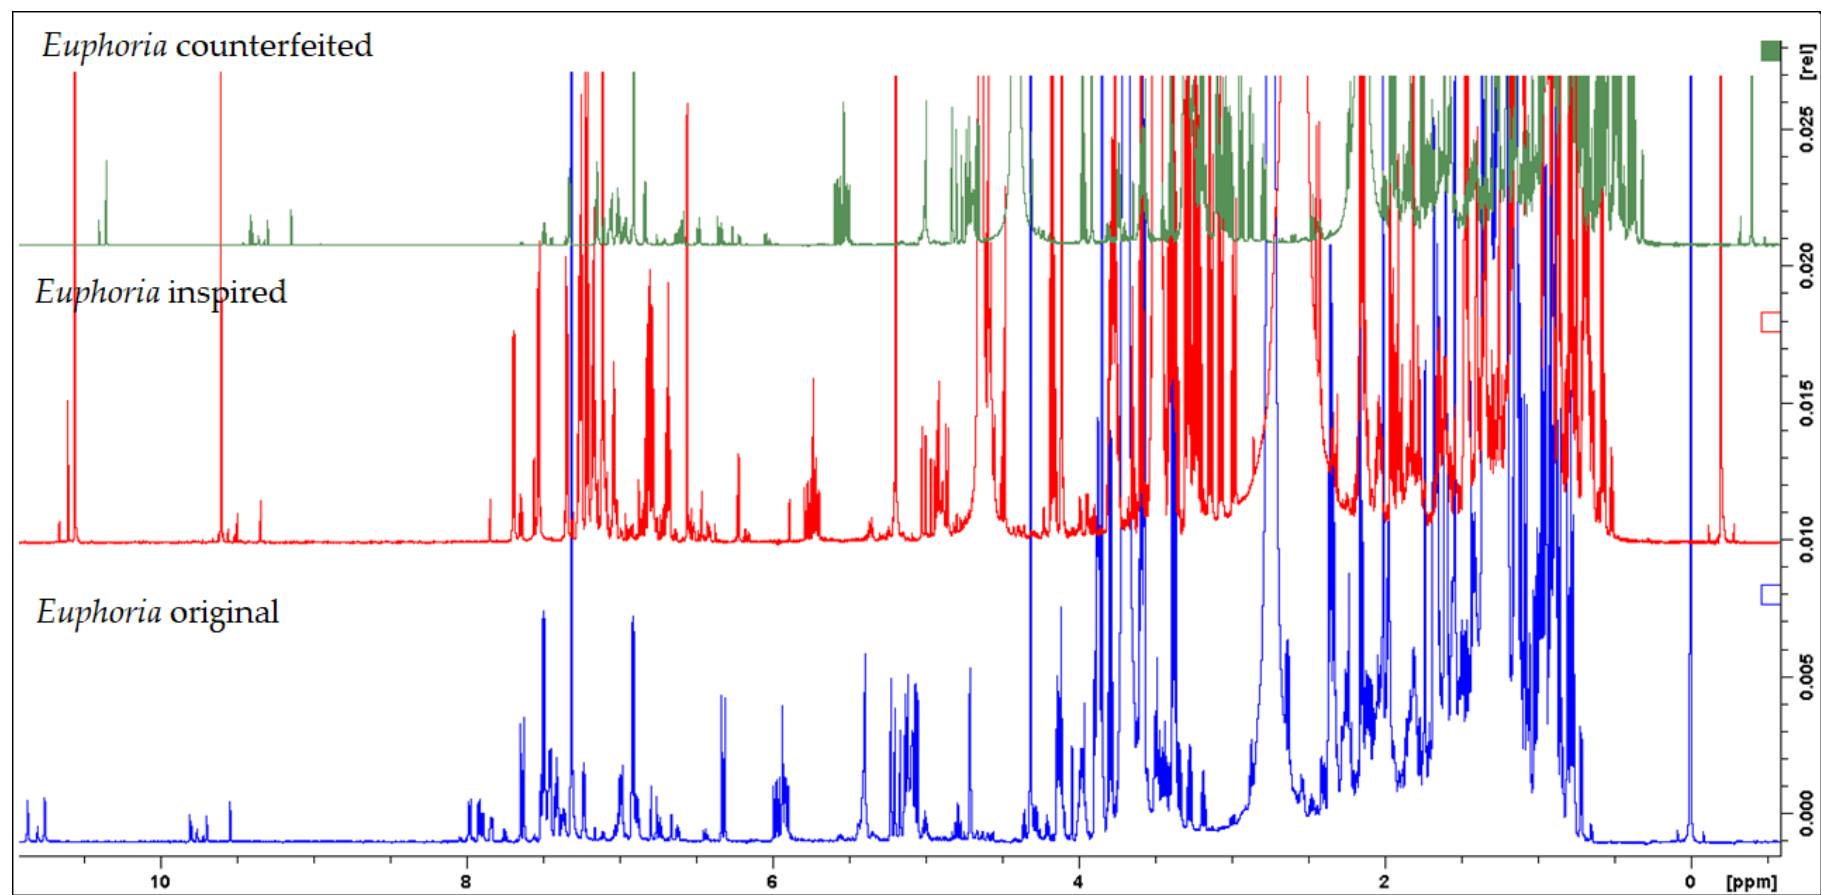

**Figure S18**  $^1\text{H}$  NMR spectra of authentic, inspired and counterfeited samples of *Euphoria* in spectral region from 0 to 11 ppm.

3. Table with main compounds assigned in  $^1\text{H}$  NMR spectra of perfume samples

**Table S1.** The main compounds assigned in  $^1\text{H}$  NMR spectra of perfume samples, their diagnostic  $^1\text{H}$  signals, chemical shifts  $\delta_{\text{H}}$  and multiplicities.

| LP | Compound                        | Functional group                          | Chemical shift [ppm] (multiplet) |
|----|---------------------------------|-------------------------------------------|----------------------------------|
| 1  | $\alpha$ -Hexyl cinnamaldehyde* | $-\text{C}(\text{O})\underline{\text{H}}$ | 9.53 (s)                         |
|    |                                 | $2\times\text{H}_{\text{Ar}}$             | 7.47 (d)                         |
|    |                                 | $2\times\text{H}_{\text{Ar}}$             | 7.42 (t)                         |
|    |                                 | $\text{H}_{\text{Ar}}$                    | 7.38 (t)                         |
|    |                                 | $\text{CH=}$                              | 7.17 (s)                         |
| 2  | Benzyl alcohol                  | $5\times\text{H}_{\text{Ar}}$             | 7.20 -7.40(m)                    |
|    |                                 | $-\underline{\text{CH}_2}-$               | 4.54 (d)                         |
| 3  | Cinnamaldehyde                  | $-\text{C}(\text{O})\underline{\text{H}}$ | 9.69 (d)                         |
|    |                                 | $\text{H}_{\text{Ar}}$                    | 6.72 (dd)                        |
|    |                                 | $\text{H}_{\text{Ar}}$                    | 7.57 (m)                         |
|    |                                 | $\text{H}_{\text{Ar}}$                    | 7.44 (m)                         |
| 4  | $\beta$ -pinene*                | $=\text{CH}_2$                            | 4.55 (m) and 4.62 (m)            |
| 5  | Benzaldehyde                    | $-\text{C}(\text{O})\underline{\text{H}}$ | 10.02 (s)                        |
|    |                                 | $2\times\text{H}_{\text{Ar}}$             | 7.86 (d)                         |
|    |                                 | $\text{H}_{\text{Ar}}$                    | 7.60 (t)                         |
|    |                                 | $2\times\text{H}_{\text{Ar}}$             | 7.51 (t)                         |
| 6  | Benzyl benzoate                 | $-\text{CH}_2-$                           | 5.35 (s)                         |
|    |                                 | $2\times\text{H}_{\text{Ar}}$             | 8.07 (d)                         |
|    |                                 | $\text{H}_{\text{Ar}}$                    | 7.55 (t)                         |
|    |                                 | $2\times\text{H}_{\text{Ar}}$             | 7.41 (t)                         |
|    |                                 | $2\times\text{H}_{\text{Ar}}$             | 7.3-7.5 (m)                      |

| LP | Compound                 | Functional group                                                             | Chemical shift [ppm] (multiplet)               |
|----|--------------------------|------------------------------------------------------------------------------|------------------------------------------------|
| 7  | Ethylene brasylate*      | -CH <sub>2</sub> -                                                           | 4.31 (s)                                       |
| 8  | Citral                   | -C(O) <u>H</u><br>=CH                                                        | 9.87 (d)<br>5.81 (d)                           |
| 9  | Citronellal              | -C(O) <u>H</u><br>-CH=                                                       | 9.75 (t)<br>5.11 (m)                           |
| 10 | Methyl dihydrojasmonate* | -CH <sub>3</sub>                                                             | 3.63 (s)                                       |
| 11 | Ethylvanillin            | -C(O) <u>H</u><br>-OCH <sub>2</sub> -                                        | 9.85 (s)<br>4.15 (q)                           |
| 12 | Vanillin                 | -C(O) <u>H</u>                                                               | 9.83 (s)                                       |
| 13 | Eugenol                  | -OCH <sub>3</sub>                                                            | 3.84 (s)                                       |
| 14 | Diethyl phthalate*       | -CH <sub>3</sub><br>-CH <sub>2</sub> -<br>H <sub>Ar</sub><br>H <sub>Ar</sub> | 1.37 (t)<br>4.37 (q)<br>7.72 (dd)<br>7.53 (dd) |
| 15 | Galaxolide*              | H <sub>Ar</sub><br>H <sub>Ar</sub>                                           | 6.76 (s)<br>7.00 (s)                           |
| 16 | γ-Terpinene*             | =CH-<br>-CH <sub>2</sub> -                                                   | 5.43 (br.s)<br>2.60 (br.s)                     |
| 17 | Geraniol                 | -CH <sub>2</sub> -                                                           | 5.20 (dt)                                      |
| 18 | Coumarin                 | =CH-<br>C(O)O-                                                               | 6.42 (d)                                       |
| 19 | Lilial                   | -C(O)H<br>-(CH <sub>3</sub> ) <sub>3</sub>                                   | 9.67 (d)<br>1.39 (s)                           |
| 20 | Linalool*                | H <sub>2</sub> C=CH-                                                         | 5.92 (m)                                       |

| LP | Compound               | Functional group                 | Chemical shift [ppm] (multiplet) |
|----|------------------------|----------------------------------|----------------------------------|
|    |                        | H <sub>2</sub> C=CH-             | 5.04 (dd) and 5.21 (dd)          |
| 21 | Limonene*              | =CH <sub>2</sub>                 | 4.71 (s)                         |
|    |                        | =CH-                             | 5.40 (br.s)                      |
| 22 | Isopropyl myristate*   | -CH-                             | 5.00 (sp)                        |
|    |                        | -(CH <sub>3</sub> ) <sub>2</sub> | 1.23 (d)                         |
| 23 | Benzyl salicylate      | -CH <sub>2</sub> -               | 5.39 (s)                         |
|    |                        | H <sub>Ar</sub>                  | 6.88 (t)                         |
|    |                        | H <sub>Ar</sub>                  | 6.97 (d)                         |
|    |                        | H <sub>Ar</sub>                  | 7.32-7.5 (m)                     |
|    |                        | H <sub>Ar</sub>                  | 7.85 (d)                         |
|    |                        | -OH                              | 10.75 (s)                        |
| 24 | Cyclohexene*           | -CH <sub>2</sub> -               | 5.66 (br.s)                      |
| 25 | Isopropyl alcohol      | -CH-                             | 4.07 (sp)                        |
|    |                        | -(CH <sub>3</sub> ) <sub>2</sub> | 1.21 (d)                         |
| 26 | Isokurkumenol*         | =CH-                             | 5.59 (br.s)                      |
| 27 | γ-Muurolene*           | -CH-CH=                          | 5.50 (d)                         |
|    |                        | =CH <sub>2</sub>                 | 4.58 (m)                         |
|    |                        | (CH <sub>3</sub> ) <sub>2</sub>  | 0.78 (d) and 0.90 (d)            |
| 28 | 1,1'-Oxydi-2-propanol* | 2x-CH <sub>2</sub> -             | 3.32 (dd) and 3.46 (dd)          |
|    |                        | 2xCH                             | 3.95 – 4.05 (m)                  |
|    |                        | 2x CH <sub>3</sub>               | 1.15 (d)                         |
| 29 | α-Cedrene*             | CH-CH <sub>3</sub>               | 0.84 (d)                         |
|    |                        | -CH-CH=                          | 2.17 (m)                         |
|    |                        | -CH-CH=                          | 5.22 (br.s)                      |
| 30 | Thujopsene*            | =CH-CH <sub>2</sub> -            | 4.99 (m)                         |

| LP | Compound                                   | Functional group                                        | Chemical shift [ppm] (multiplet)                               |
|----|--------------------------------------------|---------------------------------------------------------|----------------------------------------------------------------|
|    |                                            | =CH-CH <sub>2</sub> -<br>=C-CH <sub>3</sub>             | 1.40 (m) and 1.78 (m)<br>1.80 (br.s)                           |
| 31 | 2,6-di- <i>tert</i> -butyl-4-methylphenol* | 2xH <sub>Ar</sub><br>-OH<br>-CH <sub>3</sub>            | 7.13 (s)<br>5.14 (s)<br>2.42 (s)                               |
| 32 | Cedrol*                                    | CH <sub>3</sub> -C-OH                                   | 1.32 (br.s)                                                    |
| 33 | Methyl jasmonate*                          | -CH=CH-<br>-CH=CH-<br>-OCH <sub>3</sub>                 | 5.25 (m)<br>5.46 (m)<br>3.69 (s)                               |
| 34 | Pyrrolo[3,2,1- <i>jk</i> ]carbazole*       | =CH                                                     | 6.91 (d)                                                       |
| 35 | 2-Methylbenzofuran*                        | 2xH <sub>Ar</sub><br>=CH<br>-CH <sub>3</sub>            | 7.26 (m)<br>6.41 (td)<br>2.50 (d)                              |
| 36 | (Z)-Ocimenone*                             | -CH <sub>3</sub><br>=CH <sub>2</sub><br>=CH<br>=CH      | 2.00 (d)<br>5.53 (dd) and 5.64 (dd)<br>6.17 (dq)<br>6.40 (dd)  |
| 37 | Ambrox*                                    | -CH <sub>3</sub>                                        | 1.08 (s)                                                       |
| 38 | Ketone musk*                               | (CH <sub>3</sub> ) <sub>3</sub><br>C(O)-CH <sub>3</sub> | 1.50 (s)<br>2.45 (s)                                           |
| 39 | 2-ethylhexyl trans-4-methoxycinnamate      | =CH<br>2xH <sub>Ar</sub><br>=CH<br>2xH <sub>Ar</sub>    | 7.63 (d, J=16 Hz)<br>7.47 (d)<br>6.31 (d, J=16 Hz)<br>6.88 (d) |

| LP | Compound | Functional<br>group | Chemical shift [ppm]<br>(multiplet) |
|----|----------|---------------------|-------------------------------------|
|    |          | -OCH <sub>3</sub>   | 3.71 (s)                            |

\*Compounds detected by means of GC/MS for original *Light Blue*, its substitutes and counterfeit version by Borowiecka *et al.*

- PCA analysis conducted for full spectrum bucket tables.

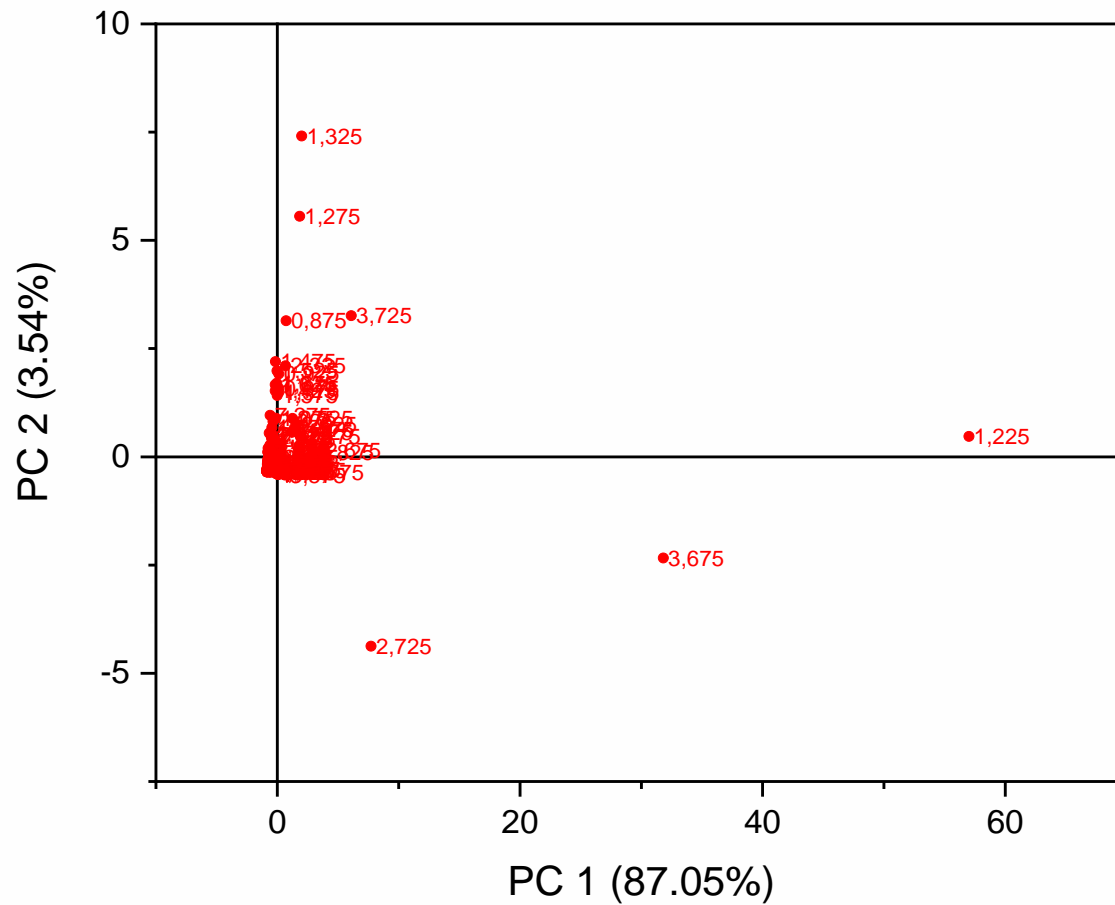

**Figure S19** PCA loading plot generated from the  $^1\text{H}$  NMR spectra from the authentic perfume and counterfeited and inspired samples for the range of chemical shifts from 0 to 10 ppm.

5. Comparison of the bucket tables from NMR spectra for two authentic samples.

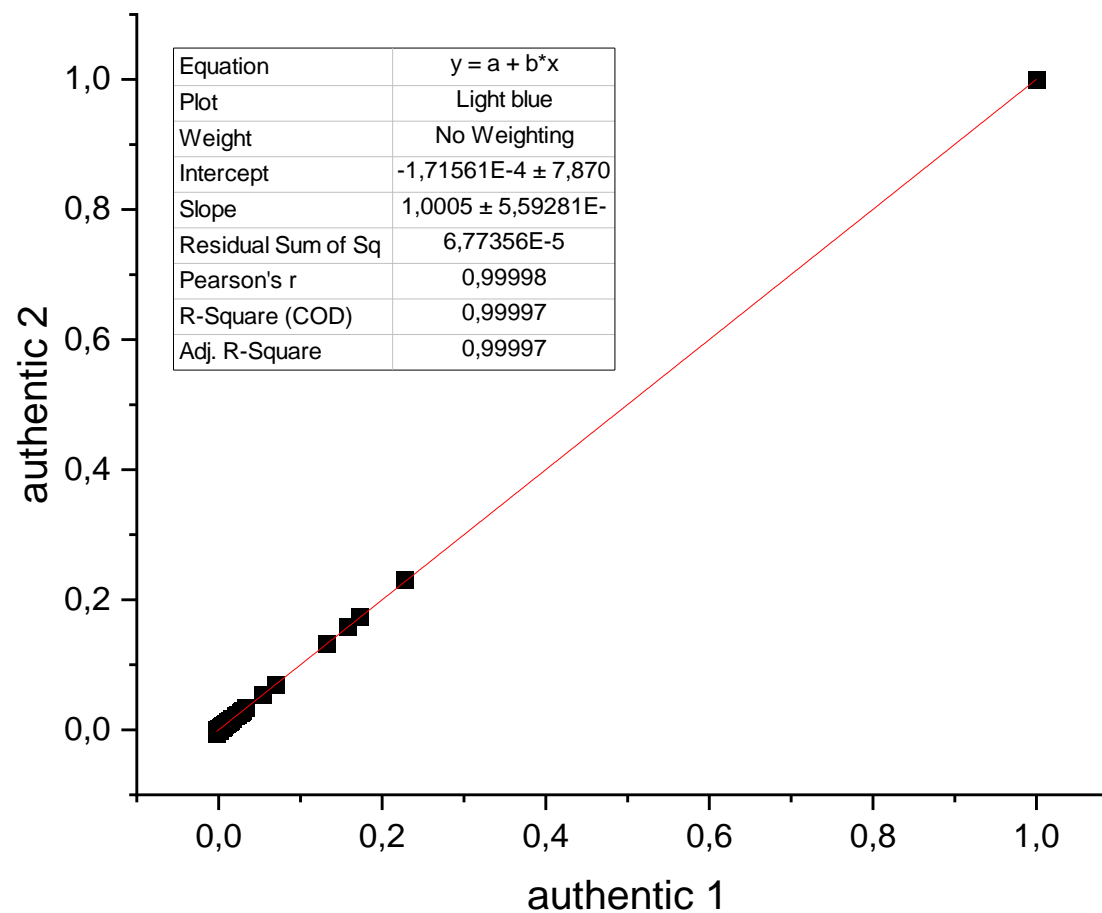

**Figure S20** The comparison of the buckets from NMR spectra for two authentic samples of *Light blue*.

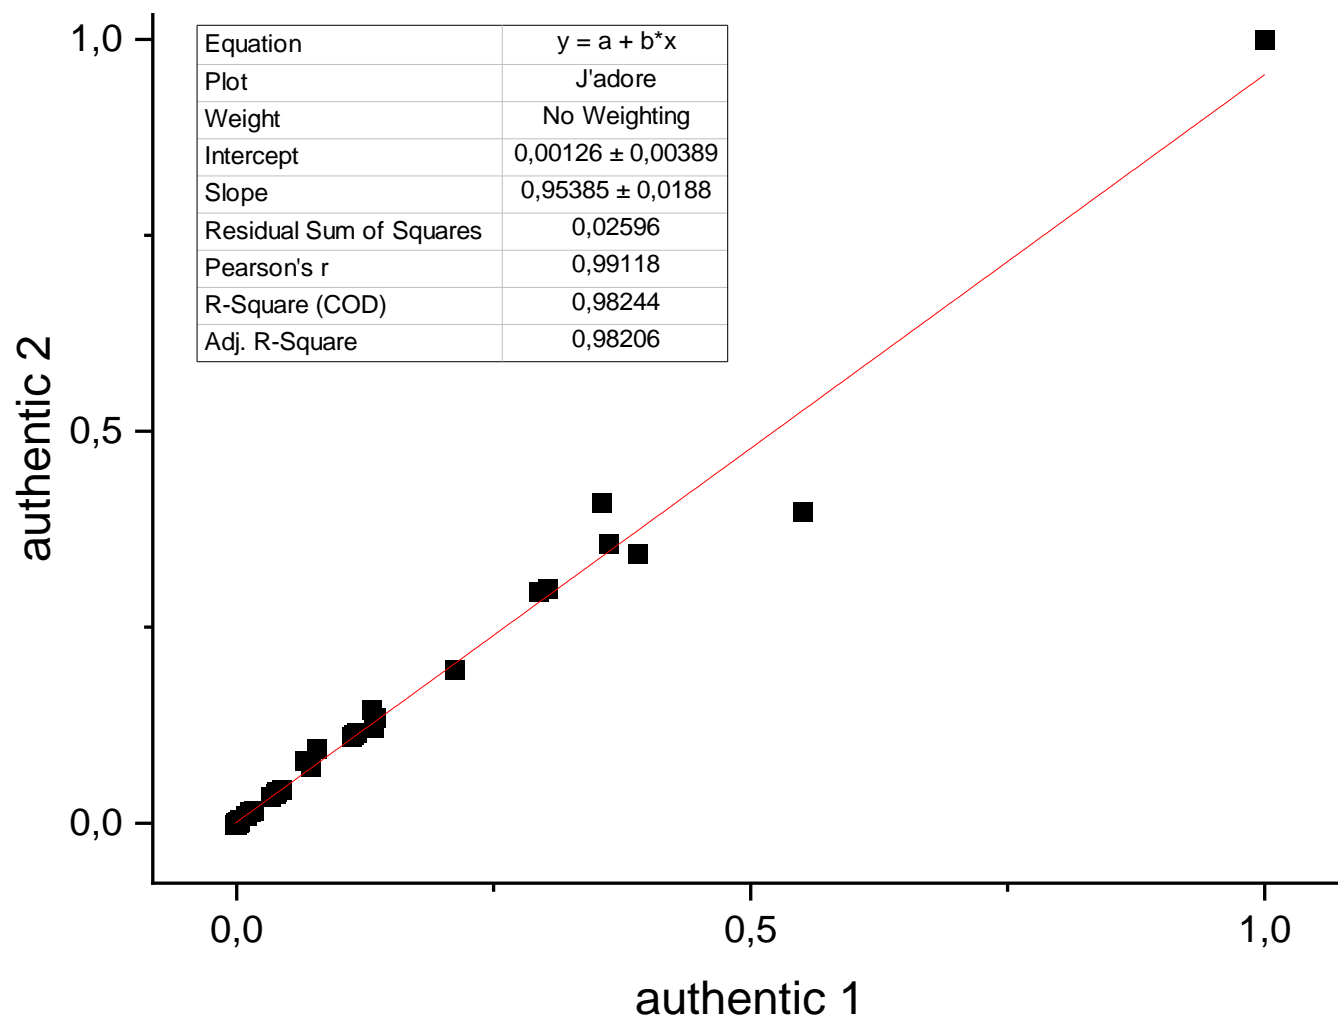

**Figure S21** The comparison of the buckets from NMR spectra for two authentic samples of *J'adore*.
